# Assessing the effects of non-pharmaceutical interventions on SARS-CoV-2 spread in Belgium by means of a compartmental, age-stratified, extended SEIQRD model and public mobility data

Tijs W. Alleman<sup>1,\*</sup>, Jenna Vergeynst<sup>1,2</sup>, Lander De Visscher<sup>2</sup>, Michiel Rollier<sup>2</sup>, Daniel Illana<sup>1</sup>, Elena Torfs<sup>1</sup>, Ingmar Nopens<sup>1</sup>, and Jan M. Baetens<sup>2</sup>

<sup>1</sup>BIOMATH, Department of Data Analysis and Mathematical Modelling, Ghent University, Coupure links 653, 9000 Gent, Belgium

<sup>2</sup>KERMIT, Department of Data Analysis and Mathematical Modelling, Ghent University, Coupure links 653, 9000 Gent, Belgium

\*Corresponding author: [Tijs W. Alleman, tijs.alleman@ugent.be](mailto:tijs.alleman@ugent.be)

March 29, 2021

## Abstract

We present a compartmental, age-stratified, nation-level, extended SEIQRD model to model SARS-CoV-2 spread in Belgium. We demonstrate the robustness of the calibration procedure by calibrating the model using incrementally larger datasets and dissect the model results by computing the effective reproduction number at home, in workplaces, in schools and during leisure activities. We find that schools are a major contributor to SARS-CoV-2 spread, with the potential to increase the basic reproduction number from  $R_e = 0.66 \pm 0.04$  to  $R_e = 1.09 \pm 0.05$  under lockdown measures. The model accounts for the main characteristics of SARS-CoV-2 transmission and COVID-19 disease and features a detailed representation of hospitals with parameters derived from two Ghent (Belgium) hospitals. Social contact during the pandemic is modelled by scaling pre-pandemic contact matrices with publically available mobility data from Google and with effectivity parameters inferred from hospitalization data. The combination of the deterministic epidemiological model, which incorporates rigid a-priori knowledge on disease dynamics, and the calibrated effectivity parameters in the social contact model allow us to combine the ease of long-term extrapolation and scenario-analysis of compartmental models with the flexibility of a data-driven model.

**keywords:** SARS-CoV-2, compartmental epidemiological model, non-pharmaceutical interventions, Google mobility data, effective reproduction number, model calibration

**NOTE:** This preprint reports new research that has not been certified by peer review and should not be used to guide clinical practice.

## 1 Introduction

1 After an initial outbreak in early 2020 in Wuhan, China, *Severe acute respiratory syndrome coronavirus 2*  
2 (SARS-CoV-2) has spread globally [21]. SARS-CoV-2 is capable of sustained human-to-human trans-  
3 mission [31], and may cause severe disease and death, especially in older individuals. The SARS-  
4 CoV-2 pandemic has, in general, shown a remarkably low incidence among children and young  
5 adults [8, 27, 36]. Furthermore, presymptomatic transmission is a major contributor to SARS-CoV-2  
6 spread [25, 39]. Both on March 15th, 2020 and on October 19th, 2020, the Belgian governments im-  
7 posed social restrictions after testing & tracing methods had failed to prevent large-scale spread of  
8 SARS-CoV-2. Recently, pharmaceutical interventions under the form of vaccinations have become  
9 available. If natural immunity wanes or if SARS-CoV-2 mutates, it is expected that SARS-CoV-2 will  
10 become endemic [32]. Hence, there is a need for well-informed models and knowledge build-up to  
11 assist policymakers in choosing the best non-pharmaceutical and pharmaceutical interventions dur-  
12 ing future SARS-CoV-2 outbreaks.

13  
14 Currently, four other models exist to inform policymakers Belgium. The agent-based model (ABM)  
15 of Willem et al. [42], the data-driven model by Barbe et al. [4] and the nation-level, age-stratified com-  
16 partmental models of Abrams et al. [3] and Franco [12]. The latter feature similar disease dynamics  
17 as our own model but rely on different assumptions to model social contact. The different model  
18 outputs are currently combined into an ensemble to inform policy makers [41]. In the ensemble, each  
19 model fulfills a niche, for instance, the ABM of Willem et al. [42] is good for studying microscopic  
20 social behaviour, and was used to inform the optimal *household bubble* size. The model of Barbé excels  
21 at short-term forecasts while our own model, together with the compartmental models of Abrams  
22 et al. [3] and Franco [12], are well-fit to study long-term scenarios.

23  
24 In this work, we built a compartmental, age-stratified, nation-level model which accounts for the  
25 main characteristics of SARS-CoV-2 disease. The model features a detailed representation of hospitals  
26 with parameters derived from two Ghent (Belgium) hospitals. We built a social contact model which  
27 scales pre-pandemic contact matrices from a study by Willem et al. [43] with publically available  
28 mobility data from Google and with effectivity parameters derived from hospitalization data using  
29 an *Markov Chain Monte Carlo* (MCMC) method [13]. Tardiness in compliance to social restrictions is  
30 included using a delayed-ramp model. We find that the combination of the deterministic epidemio-  
31 logical model, which incorporates rigid a-priori knowledge on disease dynamics, and the calibrated  
32 effectivity parameters in the social contact model allow us to combine the ease of long-term extrap-  
33 olation and scenario-analysis of compartmental models with the flexibility of a data-driven model.  
34 Further, the model does not require *ad-hoc* tweaking and is computationally cheap, making it ideal to  
35 perform optimizations which require thousands of model evaluations.

36  
37 Using a hospitalization dataset of 348 *coronavirus disease 19* (COVID-19) patients in two Ghent (Bel-  
38 gium) hospitals, we computed hospitalization parameters and used them in our model as proxies for  
39 Belgium. Using the obtained parameters, we found the model was able to predict the total number  
40 of patients in the Belgian hospitals well. We calibrated the model to high-level hospitalization data  
41 made publically available by the Belgian *Scientific Institute of Public Health* (Sciensano) and demon-  
42 strated its robustness. We computed the basic reproduction numbers ( $R_0$ ) and the time to reach com-

## 2 MATERIALS AND METHODS

---

43 pliance to lockdown measures during both *coronavirus disease 2019* (COVID-19) waves in Belgium.  
44 Using the calibrated model, we computed the relative share of contacts and the effective reproduc-  
45 tion numbers and found these to be in line with estimates from other authors at home, at school,  
46 at work and during leisure activities to asses their effect on SARS-CoV-2 spread during both 2020  
47 COVID-19 waves. We observed a strong correlation between schools re-opening and increases in  
48 SARS-CoV-2 transmission. More precisely, schools have the potential to increase the basic reproduc-  
49 tion number from  $R_e = 0.67 \pm 0.04$  to  $R_e = 1.09 \pm 0.05$  under lockdown measures.

50

51 Throughout the work, Belgium is used as a case but the scope of the work is extendable to other  
52 countries. Since February 2021, the effects of new SARS-CoV-2 strains and pharmaceutical interven-  
53 tions (vaccines) need to be accounted for. For this purpose, a model extension was developed and is  
54 currently used in the aforementioned model ensemble. However, due to the longevity of this work,  
55 we chose to limit the scope of this study to the effects of non-pharmaceutical interventions.

## 56 2 Materials and methods

### 57 2.1 The extended SEIQRD-model ( $SEI_p I_a QRD$ )

#### 58 2.1.1 Disease dynamics

59 The SEIR(D) model [19] is a compartmental model that subdivides the human population into four  
60 groups: 1. susceptible individuals (S), 2. exposed individuals in the latent phase (E), 3. infectious  
61 individuals capable of transmitting the disease (I) and 4. individuals removed from the popula-  
62 tion either through immunization or death (R/D). Despite being a simple and idealized reality, the  
63 SEIR(D) dynamics are used extensively to predict the outbreak of infectious diseases and this was no  
64 different during the SARS-CoV-2 outbreak earlier this year [8, 21, 45].

65

66 In this work, we extended the SEIRD model to incorporate more expert knowledge on SARS-CoV-2  
67 disease dynamics. For that purpose, the infectious compartment was split into four parts. The first is  
68 a period of presymptomatic infectiousness because several studies have shown that presymptomatic  
69 transmission is a dominant transmission mechanism of SARS-CoV-2 [25, 39]. After the presymp-  
70 tomatic period, three possible infectious outcomes are modeled: (1) Asymptomatic outcome, for in-  
71 dividuals who show no symptoms at all, (2) Mild outcome, for individuals with mild symptoms who  
72 recover at home, and (3) Hospitalization, when mild symptoms worsen. Children and young adults  
73 have a high propensity to experience an asymptomatic or mild outcome, while older individuals  
74 have a higher propensity to be hospitalized [25, 39]. Belgian hospitals generally have two wards for  
75 COVID-19 patients: 1) *cohort*, where patients are not monitored continuously and 2) *Intensive care*  
76 *units* (ICUs), for patients with the most severe symptoms. Intensive care includes permanent moni-  
77 toring, the use of ventilators or the use of extracorporeal membrane oxygenation (ECMO). Patients  
78 generally spend limited time in the emergency room and/or in a buffer ward before going to cohort.  
79 After spending limited time in cohort, some patients are transferred to ICU. Patients can perish in  
80 both wards, but mortalities are generally lower in cohort. After a stay in an ICU, patients return  
81 to cohort for recovery in the hospital. During the recovery stay, mortality is generally limited. We  
82 assume that mildly infected individuals and hospitalized patients cannot infect susceptibles (Q). The

83 model dynamics are depicted in Figure 1.

### 84 2.1.2 Model structure and equations

85 In this work, we implemented the extended SEIQRD dynamics shown in Figure 1 using ordinary dif-  
 86 ferential equations, without spatial stratification and with age-stratification. This was accomplished  
 87 by defining a system of  $K.N$  ordinary differential equations, one for every of the  $K = 11$  model com-  
 88 partments, each of which is further split into  $N = 9$  age-stratified metapopulations. The age-groups  
 89 have different contact rates with other age-groups and the disease progresses differently for each age-  
 90 group, making the model behave in a realistic way. Our model consists of 9 age classes, i.e.,  $[0,10[$ ,  
 91  $[10,20[$ ,  $[20,30[$ ,  $[30,40[$ ,  $[40,50[$ ,  $[50,60[$ ,  $[60,70[$ ,  $[70,80[$ ,  $[80, \infty[$ . The advantage of this approach are  
 92 the limited computational resources required to explore scenarios and perform optimizations that  
 93 require thousands of function evaluations. The disadvantage is the assumption of homogeneous  
 94 mixing of the entire Belgian population, i.e. every contact between individuals in the Belgian pop-  
 95 ulation is assumed to be completely *random*. More realistic approaches are spatial patch models,  
 96 network-based models, agent-based models or combinations thereof. However, these come at a sub-  
 97 stantial significant computational cost. Because Belgium is a small and heavily urbanised country,  
 98 a spatially explicit model becomes relevant at very low SARS-CoV-2 prevalences. The macroscopic  
 99 coarse-graining of homogeneous mixing works well to describe major COVID-19 waves, but is less fit  
 100 for monitoring the disease at low prevalences. The model dynamics are translated into the following  
 101 system of coupled ordinary differential equations,

$$\dot{S}_i = -\beta S_i \sum_{j=1}^N N_{c,ij} \left( \frac{I_j + A_j}{T_j} \right), \quad (1)$$

$$\dot{E}_i = \beta S_i \sum_{j=1}^N N_{c,ij} \left( \frac{I_j + A_j}{T_j} \right) - (1/\sigma) \cdot E_i, \quad (2)$$

$$\dot{I}_i = (1/\sigma)E_i - (1/\omega)I_i, \quad (3)$$

$$\dot{A}_i = (a_i/\omega)I_i - (1/d_a)A_i, \quad (4)$$

$$\dot{M}_i = ((1 - a_i)/\omega)I_i - ((1 - h_i)/d_m + h_i/d_{\text{hosp}})M_i, \quad (5)$$

$$\dot{ER}_i = (h_i/d_{\text{hosp}})M_i - (1/d_{\text{ER}})ER_i, \quad (6)$$

$$\dot{C}_i = c_i(1/d_{\text{ER}})ER_i - (m_{C,i}/d_{c,D})C_i - ((1 - m_{C,i})/d_{c,R})C_i, \quad (7)$$

$$\dot{ICU}_i = (1 - c_i)(1/d_{\text{ER}})ER_i - (m_{ICU,i}/d_{ICU,D})ICU_i \quad (8)$$

$$-((1 - m_{ICU,i})/d_{ICU,R})ICU_i, \quad (9)$$

$$\dot{C}_{ICU,rec,i} = ((1 - m_{ICU,i})/d_{ICU,R})ICU_i - (1/d_{ICU,rec})C_{ICU,rec,i}, \quad (10)$$

$$\dot{D}_i = (m_{ICU,i}/d_{ICU,D})ICU_i + (m_{C,i}/d_{c,D})C_i, \quad (11)$$

$$\dot{R}_i = (1/d_a)A_i + ((1 - h_i)/d_m)M_i + ((1 - m_{C,i})/d_{c,R})C_i \quad (12)$$

$$+ (1/d_{ICU,rec})C_{ICU,rec,i}, \quad (13)$$

for  $i = 1, 2, \dots, 9$ . Here,  $T$  stands for total population (Table 1),  $S$  stands for susceptible,  $E$  for exposed,  $I$  for presymptomatic and infectious,  $A$  for asymptomatic and infectious,  $M$  for mildly symptomatic and infectious,  $ER$  for emergency room and/or buffer ward,  $C$  for cohort,  $C_{ICU,rec}$  for a recovery stay in cohort coming from Intensive Care,  $ICU$  for Intensive Care Unit,  $H$  for hospitalised,

## 2 MATERIALS AND METHODS

### 2.1 The extended SEIQRD-model ( $SEI_p I_a QRD$ )

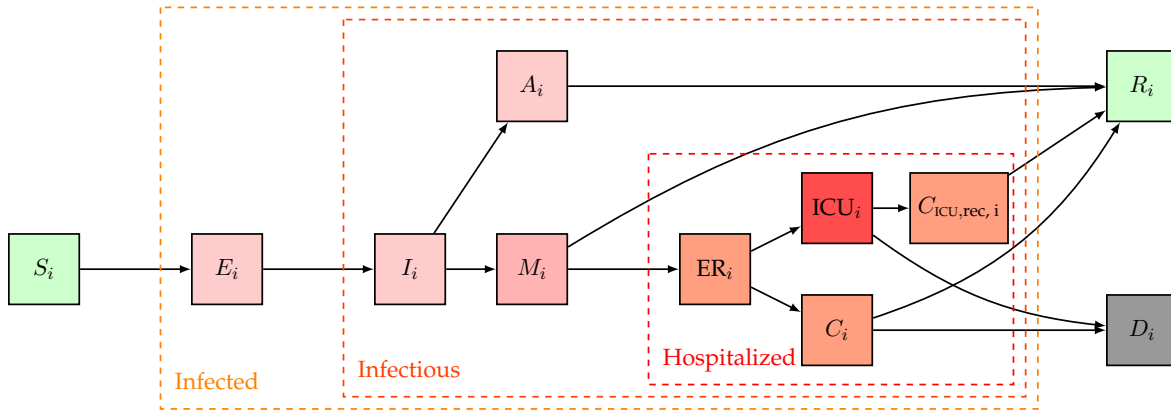

**Figure 1:** Extended SEIQRD dynamics used in this study. Here,  $S$  stands for susceptible,  $E$  for exposed,  $I$  for presymptomatic and infectious,  $A$  for asymptomatic and infectious,  $M$  for mildly symptomatic and infectious,  $ER$  for emergency room and/or buffer ward,  $C$  for cohort,  $C_{ICU,rec}$  for a recovery stay in cohort coming from IC,  $ICU$  for Intensive Care Unit,  $D$  for dead and  $R$  for recovered. A subscript  $i$  is used to denote the  $i$ th age strata of the model, the model has a total of nine age strata. An overview of the model parameters can be found in table 3.

$D$  for dead and  $R$  for recovered. A subscript to these variables is used to refer to one of the nine age strata in the model. Using the above notation, all model states are 9-dimensional vectors,

$$\mathbf{S} = [S_1(t) \ S_2(t) \ \dots \ S_i(t)],$$

102 where  $S_i(t)$  denotes the number of susceptibles in age-class  $i$  at time  $t$  after the introduction of SARS-  
 103 CoV-2 in the population. As initial condition, the whole population is assumed susceptible to SARS-  
 104 CoV-2 and one exposed patient in every age class is assumed, so  $E_i(0) = 1$  for all  $i = 1, 2, \dots, 9$ . The  
 105 time between the start of the simulation and the start of data collection must then be estimated when  
 106 calibrating the model. An overview of all model parameters, their values and their meaning can be  
 107 found in table 3. In what follows, the most important model parameters and their chosen values are  
 108 motivated.

#### 109 2.1.3 Model parameters

110 **Transmission rate and social contact data** The transmission rate of the disease depends on the  
 111 product of four contributions (Equation 1). The first contribution,  $(I_j + A_j)/T_j$ , is the fraction of con-  
 112 tagious individuals in age group  $j$ . We thus assume presymptomatic and asymptomatic individuals  
 113 spread the disease, while mildly infected are assumed to self-quarantine and hospitalized individuals  
 114 cannot infect health care workers. The second contribution,  $N_{c,ij}$ , is the average number of human-  
 115 to-human interactions of an individual in age group  $i$ , with an individual in age group  $j$  per day.  
 116 The sum of the first two contributions over all age groups  $j$ ,  $\sum_{j=1}^N N_{c,ij}(I_j + A_j)/T_j$ , is the number  
 117 of contacts of an individual in age group  $i$  that can result in SARS-CoV-2 transmission. This is multi-  
 118 plied with the number of susceptibles in age group  $i$  ( $S_i$ ), and with  $\beta$ , the probability of contracting  
 119 COVID-19 when encountering a contagious individual, to compute the number of effective contacts

## 2.1 The extended SEIQRD-model (SEI<sub>p</sub>I<sub>a</sub>QRD)

## 2 MATERIALS AND METHODS

at every timestep. We assume that the per contact transmission probability  $\beta$  is independent of age and we infer its distribution by calibrating the model to national Belgian hospitalization data. We assume individuals of all ages have an equal susceptibility to and transmissibility to SARS-CoV-2 infection. In a model based inference-based study by Davies et al. [8], it was deduced that children were less susceptible to SARS-CoV-2 disease. However, this is most likely due to underreporting of cases in children. Viner et al. [37] analyzed 32 studies who reported on the susceptibility of children and found that data were insufficient to conclude that transmissibility of SARS-CoV-2 by children is lower than by adults. The number of (pre-pandemic) human-human interactions,  $N_c$ , are both place and age-dependent. These matrices assume the form of a  $9 \times 9$  *interaction matrix* where an entry  $i, j$  denotes the number of social contacts age group  $i$  has with age group  $j$  per day. These matrices are available for homes, schools, workplaces, in public transport, and leisure activities, from a study by Willem et al. [43]. The total number of prepandemic social interactions must be translated into an appropriate weighted sum of the contributions in different places, adequately describing pandemic social behaviour (Section 2.3). The basic reproduction number  $R_0$ , defined as the expected number of secondary cases directly generated by one case in a population where all individuals are susceptible to infection, is computed using the next generation matrix (NGM) approach introduced by Diekmann et al. [10, 11]. For our model, the basic reproduction number of age group  $i$  is,

$$R_{0,i} = (a_i d_a + \omega) \beta \sum_{j=1}^N N_{c,ij} \quad (14)$$

and the population basic reproduction number is calculated as the weighted average over all age groups using the demographic data in Table 1. The detailed algebra underlying the computation Equation 14 is presented in the supplementary materials (Section 7.4).

**Latent period, Pre-symptomatic infectiousness** Estimates for the incubation period range from 3.6 days to 6.4 days, with most estimates close to 5 days. For the average serial interval, the period between the onset of symptoms in the primary case and onset of symptoms in the secondary case, estimates range from 4.0 to 7.5 days [30]. These estimates are roughly the same, which indicates that presymptomatic transmission is contributing to SARS-Cov-2 spread. If the transmission takes place during the symptomatic period of the primary case, the serial interval is longer than the incubation period. However, this relationship can be reversed when presymptomatic transmission takes place. The secondary case may even experience illness onset before onset in their infector, resulting in a negative serial interval. Liu et al. [25] estimated that 23 % of transmissions in Shenzhen may have originated from presymptomatic infections, He et al. [17] concluded that 44 % of secondary cases were infected during the presymptomatic stage. Wei et al. [39] investigated all 243 cases of COVID-19 reported in Singapore from January 23–March 16 and identified seven clusters of cases in which presymptomatic transmission is the most likely explanation for the occurrence of secondary cases. They determined that presymptomatic transmission exposure occurred 1-3 days before the source patient developed symptoms. In Equation 3,  $\sigma$  denotes the length of the latent, non-infectious period and in Equation 4,  $\omega$  is the length of the presymptomatic infectious period. In this work, we assume the incubation period, equal to  $\omega + \sigma$ , lasts 5.2 days [25]. We then infer the length of the presymptomatic infectious period from hospitalization data using an MCMC method (Section 2.4).

## 2 MATERIALS AND METHODS

### 2.1 The extended SEIQRD-model (SEI<sub>p</sub>I<sub>a</sub>QRD)

158 **Duration of the infectious period** The duration of infectiousness is determined by the num-  
159 ber of days patients are able to spread viral particles. He et al. [17] analyzed both data from 77  
160 infector–infectee transmission pairs and 414 throat swabs collected from 94 patients from symptom  
161 onset up to 32 days after onset. The highest viral load was observed in throat swabs at the time of  
162 symptom onset. Other studies reported similar PCR results, with patients have the highest viral load  
163 of the coronavirus at the time they are diagnosed, with viral loads declining gradually over time  
164 [20, 26, 35, 47]. The inferred infectiousness profile of He et al. [17] is an approximate normal distribu-  
165 tion, with the peak infectivity roughly at the time of symptom onset. Infectiousness was estimated to  
166 decline quickly within 7 days after symptom onset. Zou et al. [47] found a steep decline in viral load  
167 between 6 and 12 days after symptom onset. A comparison of viral load between symptomatic and  
168 one asymptomatic case revealed similar viral loads, an indicator that asymptomatic individuals can  
169 be as infectious as symptomatic patients. It was further concluded that viral load alone is not a clear  
170 predictor of disease outcome. Given the evidence presented above, we assume the average dura-  
171 tion of infectiousness is 7 days for mildly symptomatic cases. The average duration of asymptomatic  
172 infectiousness will be inferred from hospitalization data using an MCMC method (Section 2.4).

173 **Disease severity and hospitalizations** The model parameter  $a_i$  (Equation 4) is the probability  
174 of an individual in age group  $i$  having a subclinical infection. Several authors have attempted to  
175 estimate the fraction of asymptomatic infections. Li et al. [22] estimated that 86 % of coronavirus  
176 infections in China were “undocumented” in the weeks before their government instituted stringent  
177 quarantines. However, this Figure includes an unknown number of mildly symptomatic cases and  
178 is thus an overestimation of the asymptomatic fraction. In Iceland, citizens were invited for testing  
179 regardless of symptoms. Of all people with positive test results, 43 % were asymptomatic [15]. As  
180 previously mentioned, there is a strong relationship between the age of the patient and the severity  
181 of the disease. Wu et al. [44] estimated the relative fraction of asymptomatic cases per age group from  
182 publically available Wuhan data. In this study, the subclinical fractions per age group estimated by  
183 Davies et al. [8] are used (table 1). For Belgium, this results in a population average subclinical frac-  
184 tion of 57 %. In Equation 5,  $h_i$  is the fraction of mild cases that require hospitalization in age group  $i$   
185 and in Equation 7,  $c_i$  is the fraction of the hospitalized which remain in cohort in age group  $i$ . In this  
186 study, we use the age-stratified hospitalization probabilities computed by Verity et al. [36] (table 1).  
187 The distributions between cohort and ICU are computed using data from 370 patients treated in two  
188 Ghent (Belgium) hospitals (Section 2.2).

189  
190 In Equation 5,  $d_{\text{hosp}}$  is the average time between first symptoms and hospitalization, which was pre-  
191 viously estimated as 5-9 days by Linton et al. [23] and as 4 days by To et al. [35]. In Equation 6,  $d_{\text{ER}}$   
192 is the time a patient spends in the emergency room and/or buffer wards before going to cohort or  
193 ICU. In Equations 7, 8 and 9,  $d_{c,R}$ ,  $d_{c,D}$ ,  $d_{\text{ICU},R}$  and  $d_{\text{ICU},D}$  are the average lengths of a hospital stay  
194 in cohort and in an ICU. The subscript  $R$  denotes the duration if the patient recovers, while subscript  
195  $D$  denotes the duration if the patient perishes.  $m_C$  and  $m_{\text{ICU}}$  are the mortalities of patients in cohort  
196 and in ICU. In Equation 10,  $d_{\text{ICU},\text{rec}}$  is the length of a recovery and observation stay in cohort after being  
197 in ICU. Because detailed hospitalization data has unfortunately not yet been made publicly avail-  
198 able by the Belgian Scientific Institute of Public Health (Sciensano), all hospitalization parameters are  
199 inferred from data of 370 patients, treated in two Ghent (Belgium) hospitals. These parameters are  
200 used as temporary proxies to fit the model to the total number of patients in Belgian hospitals and

## 2.2 Analysis of hospital data

## 2 MATERIALS AND METHODS

201 ICU until the complete Belgian dataset is made publically available. The methodology of the analysis  
 202 is presented in Section 2.2, the results of the analysis are presented in Section 3.1.

203 **Testing, tracing and quarantine, re-susceptibility** Testing and tracing are not explicitly imple-  
 204 mented for this study. However, the average effect of the testing and tracing bodies setup during the  
 205 pandemic will be included in an indirect way after the parameter inference. Liu et al. [24] found that  
 206 after SARS-CoV-2 infection, it is unlikely that long-lasting protective antibodies are produced. It is  
 207 thus deemed likely that re-susceptibility will play an important role in future modeling work.

**Table 1:** Structure of the Belgian population per 10 year intervals [34]. Sub-clinical fractions per age group as reported by Davies et al. [8]. Hospitalization probability for symptomatic infections per age group in China [36].

| Age group (years) | number of individuals | Subclinical fraction (%) | Hospitalization (%) |
|-------------------|-----------------------|--------------------------|---------------------|
| [0, 10[           | 1 305 219             | 71                       | 0.1                 |
| [10, 20[          | 1 298 970             | 79                       | 0.3                 |
| [20, 30[          | 1 395 385             | 73                       | 1.2                 |
| [30, 40[          | 1 498 535             | 67                       | 3.2                 |
| [40, 50[          | 1 524 152             | 60                       | 4.9                 |
| [50, 60[          | 1 601 891             | 51                       | 10.2                |
| [60, 70[          | 1 347 696             | 37                       | 16.6                |
| [70, 80[          | 908 725               | 31                       | 24.3                |
| [80, $\infty$ [   | 658 753               | 31                       | 27.3                |
| <b>Population</b> | 11.539.326            | 57                       | 8.1                 |

208

## 209 2.2 Analysis of hospital data

210 The raw datasets consisted of 396 patients in two Ghent (Belgium) hospitals, Ghent University hos-  
 211 pital and AZ Maria Middelaes. For every patient the following data were provided: 1) age, 2) sex, 3)  
 212 hospital admission date, 4) hospital discharge date, 5) date of ICU transfer, 6) date of ICU discharge,  
 213 7) outcome (recovered or deceased). Since only age and gender of the patient were provided, all data  
 214 were anonymous and could not be traced back to individual patients. The date at which patients first  
 215 reported having symptoms was only recorded by Ghent University hospital, while the time spent in  
 216 the emergency room, buffer ward or triage was only registered by AZ Maria Middelaes. Data from  
 217 26 patients had to be excluded from the analysis because one or more entries were missing. Of the  
 218 remaining 370 patients, 22 patients were discharged from the emergency room and could not be used  
 219 in the analysis. Thus, in total, data from the remaining 348 patients were used to compute the follow-  
 220 ing hospitalisation parameters:  $c$ ,  $d_{c,R}$ ,  $d_{c,D}$ ,  $d_{ICU,R}$  and  $d_{ICU,D}$ ,  $d_{ICU,rec}$ ,  $m_C$  and  $m_{ICU}$ . The length of  
 221 stay in the emergency room or a buffer ward ( $d_{ER}$ ) was computed solely using data from AZ Maria  
 222 Middelaes and the average time from symptom onset to hospitalisation ( $d_{hosp}$ ) was computed using



## 2 MATERIALS AND METHODS

### 2.3 Social contact model

223 the Ghent University hospital data. To determine if the duration of a cohort or ICU stay differed  
224 significantly if the patient recovers or dies, a non-parametric Mann-Whitney U-test was used.

### 225 2.3 Social contact model

226 **Mobility reductions** As previously mentioned, the social behaviour of the Belgian population  
227 must be translated into a linear combination of the aforementioned pre-pandemic interaction ma-  
228 trices. Mathematically, we must find tangible coefficients so that the linear combination of pre-  
229 pandemic interaction matrices, i.e.,

$$N_c = \alpha N_{c, \text{home}} + \beta N_{c, \text{schools}} + \gamma N_{c, \text{work}} + \delta N_{c, \text{transport}} + \epsilon N_{c, \text{leisure}} + \phi N_{c, \text{others}}, \quad (15)$$

230 is a good representation of macroscopic social behaviour during the pandemic. Instead of using pre-  
231 pandemic contact matrices, modellers would ideally use pandemic contact matrices to build disease  
232 models as these are expected to better represent mixing behaviour under lockdown measures. Al-  
233 though these new contact studies under social restrictions will be valuable during future pandemics,  
234 such matrices were not available at the start of the pandemic. Hence, our model builds upon pre-  
235 pandemic knowledge of social behaviour to make a prediction on pandemic social behaviour.

236  
237 First, the *Google Community Mobility Reports* for Workplaces, Transit stations, Retail & recreation and  
238 Groceries & pharmacy are used as proxies to scale the work, transport, leisure and other social con-  
239 tact matrices (Figure 2). Two surges in COVID-19 cases were observed in Belgium, resulting in two  
240 lockdowns. The first lockdown was imposed on March 15th, 2020 and lasted until May 4th, 2020 and  
241 involved the closure of schools, bars, clubs, restaurants, all non-essential shops and a closure of bor-  
242 der to non-essential travel (Table 4). From May 4th, 2020 until July 1st, 2020 the lockdown was grad-  
243 ually lifted. During the first lockdown, schools remained fully closed until May 18th, 2020 and were  
244 only re-opened to a very limited extent before the end of the school year on July 1st, 2020. The second  
245 lockdown was imposed on October 19th, 2020 and is still ongoing at the time of writing. Schools were  
246 closed on November 2nd, 2020 and re-opened on November 16th, 2020. Further, schools have been  
247 closed during Christmas holidays from December 18th, 2020 until January 4th, 2021. Universities  
248 have remained fully closed since October 19th, 2020. Briefly summarized, the first 2020 COVID-19  
249 wave consisted of 1) a rapid surge in cases, 2) a lockdown, and 3) a release of lockdown measures.  
250 The second 2020 COVID-19 wave consisted of 1) a rapid surge in cases, 2) a lockdown with schools  
251 closed, 3) a lockdown with varying school policies. A more detailed overview of all key events in  
252 Belgium during the COVID-19 pandemic is provided in the supplementary materials (Section 7.3).

253  
254 During both lockdowns, residential mobility increases were observed (Figure 2). Although the mobil-  
255 ity figures indicate people spent more time at home, this does not mean people have more contacts at  
256 home (especially under stay-at-home orders). Further, the coefficients of the interaction matrices are  
257 also influenced by *network* effects and may thus not scale linearly with the decrease in the observed  
258 mobility. During a strict lockdown where social *bubbles* are the norm, an intra-household contact does  
259 not have the same weight as a random, extra-household contact as long as the virus is outside of the  
260 social *bubble*. However, amplifying the fraction of household contacts under lockdown measures will  
261 increase intergenerational mixing of the population under lockdown, which is unrealistic and will  
262 lead to overestimations of the hospitalizations. The inability to capture such dynamics is an inherent

### 2.3 Social contact model

## 2 MATERIALS AND METHODS

263 downside of compartmental epidemiological models. We thus used a coefficient of 1.0 for the home  
 264 interaction matrix  $N_{c,home}$ .

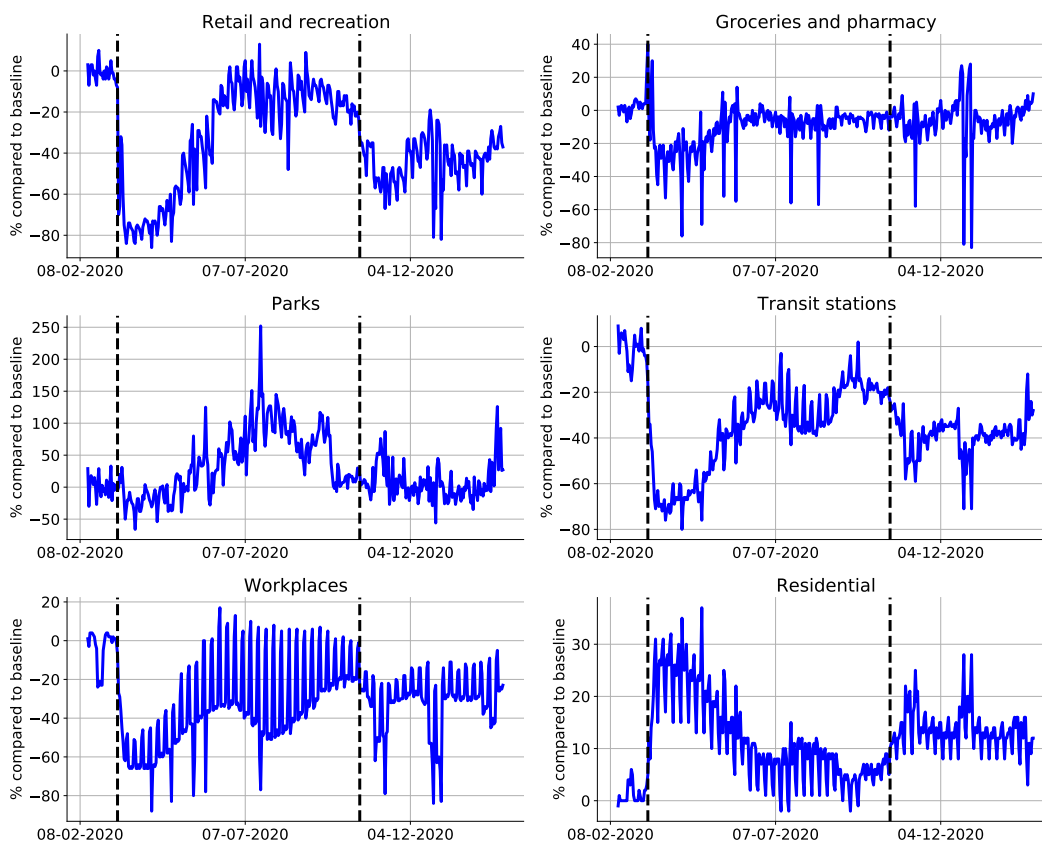

**Figure 2:** Mobility data extracted from the *Google Community Mobility Reports*. Dashed lines indicates the start of the first lockdown on Friday March 13th, 2020 and the start of the second lockdown on Monday October 19th, 2020. The mobility reduction in *workplaces* is used to scale the work interactions matrix, the *retail & recreation* reduction is used to scale the leisure interaction matrix, the *groceries & pharmacy* reduction is used to scale the other interaction matrix, the *transit stations* reduction is used to scale the public transport mobility matrix.

265 **Effectivity parameters** During the first lockdown, we estimated that the overall effectiveness  
 266 of the contacts ( $\Omega$ ) was approximately one third of what would be expected based on the *Google*  
 267 *Community Mobility* reductions and the pre-pandemic contacts. Over the course of the first lockdown,  
 268 work mobility decreased by 56 %, the public transport mobility decreased by 65 %, leisure mobility  
 269 decreased by 72 % and grocery (others) mobility decreased by 26 % (Table 4). Mathematically,

$$N_c \approx \underbrace{\Omega}_{\approx 0.30} \left[ N_{c,home} + (1-0.56)N_{c,work} + (1-0.65)N_{c,transport} + (1-0.72)N_{c,leisure} + (1-0.26)N_{c,others} \right], \quad (16)$$

## 2 MATERIALS AND METHODS

### 2.3 Social contact model

270 Intuitively, the effectivity of a contacts may not scale linearly with the observed mobility reductions.  
 271 The net effectivity of the contacts under lockdown measures depends on a combination of the pre-  
 272 pandemic physical proximity and duration of the contact, the effectivity of preventive measures and  
 273 on behavioural changes. As an example, the effects of alcohol gel and face masks might be large  
 274 in the workplace and in grocery stores, but not at home or during leisure activities. To account for  
 275 different effectivities of contacts in different places, we could introduce one additional parameter per  
 276 contact matrix, bound between zero and one, and infer its distribution from the available hospital-  
 277 ization data. However, estimating six effectivity parameters was unfeasible because of identifiability  
 278 issues. We determined that the effectivity parameters of public transport and other places could not  
 279 be identified. This is most likely because very little contacts are made in those places [28]. Conse-  
 280 quently, the effectivity parameters of public transport, other places and leisure contacts were lumped  
 281 to reduce the number of effectivity parameters from six to four. Finally, the linear combination of  
 282 interaction matrices used to represent social contact under lockdown measures is,

$$N_c(t) = \Omega_{\text{home}} N_{c, \text{home}} + \Omega_{\text{schools}} H_{\text{schools}}(t) N_{c, \text{schools}} + \Omega_{\text{work}} G_{\text{work}}(t) N_{c, \text{work}} + \Omega_{\text{rest}} \left[ G_{\text{transit}}(t) N_{c, \text{transport}} + G_{\text{retail \& recreation}}(t) N_{c, \text{leisure}} + G_{\text{grocery \& pharmacy}}(t) N_{c, \text{others}} \right]. \quad (17)$$

283 Here,  $N_{c, \text{home}}$ ,  $N_{c, \text{schools}}$ ,  $N_{c, \text{work}}$ ,  $N_{c, \text{transport}}$ ,  $N_{c, \text{leisure}}$  and  $N_{c, \text{others}}$  denote the pre-pandemic contact  
 284 matrices at home, in schools, in workplaces, on public transport, during leisure activities and during  
 285 other activities [43].  $G_{\text{work}}$ ,  $G_{\text{transit}}$ ,  $G_{\text{retail \& recreation}}$  and  $G_{\text{grocery \& pharmacy}}$  denote the *Google Community*  
 286 *Mobility Reports* mobility reductions in the respective categories.  $H_{\text{schools}}$  is a Heaviside step function  
 287 to open or close schools, as school opening cannot be deduced from the Google community mobility  
 288 reports. In spite of their limited re-opening on May 18th, 2020, schools are assumed to be closed dur-  
 289 ing the first lockdown.  $\Omega_{\text{home}}$ ,  $\Omega_{\text{schools}}$ ,  $\Omega_{\text{work}}$ ,  $\Omega_{\text{rest}}$  are the effectivity parameters at home, in schools,  
 290 at work and during leisure, public transport and other activities. Note that these parameters are not  
 291 time-varying, there is thus no link between the effectivity parameters and the mobility reduction.  
 292 However, when relaxing measures, an increase in mobility will likely be accompanied by an increase  
 293 of the effectiveness of the contacts. This is due to mentality changes upon relaxation, as measures  
 294 will gradually be ignored more.

295 **Obedience to measures** In reality, compliance to social restrictions is gradual and cannot be mod-  
 296 eled using a step-wise change of the social interaction matrix  $N_c$  (Section 2.1.3). This can be seen  
 297 upon close inspection of the *Google community mobility report* after lockdown measures were taken  
 298 (Figure 2). Because Google mobility data are updated daily in the model, the effect of gradual mo-  
 299 bility changes are inherently included. However, the added value of a social compliance model is to  
 300 gradually introduce the effects of the effectivity parameters in the model. Further, since the compli-  
 301 ance model parameters will be estimated from hospitalization data, the added degrees of freedom  
 302 aid in obtaining a better model fit to the peak hospitalizations. In our model, we use a delayed ramp  
 303 to model compliance, i.e.,

$$N_c(t - t_0) = N_{c, \text{old}} + f(t - t_0, \tau, l)(N_{c, \text{new}} - N_{c, \text{old}}) \quad (18)$$

304 where,

$$f(t - t_0, \tau, l) = \begin{cases} 0.0, & \text{if } t - t_0 \leq \tau \\ \frac{t - t_0}{l} - \frac{\tau}{l}, & \text{if } \tau < t - t_0 \leq \tau + l \\ 1.0, & \text{otherwise} \end{cases}$$

## 2.4 Parameter identification and model predictions 2 MATERIALS AND METHODS

305 where  $\tau$  is the number of days before measures start having an effect and  $l$  is the number of additional  
306 days after the time delay until full compliance is reached. Both parameters are calibrated to the daily  
307 number of hospitalizations in Belgium (Section 2.4). The difference  $t - t_0$  denotes the number of days  
308 since a change in social policy.

### 309 2.4 Parameter identification and model predictions

310 **Aim of the calibration procedure** To demonstrate the robustness of the social contact model  
311 and calibration method, for each of the 2020 COVID-19 waves, we calibrate the model to a minimal  
312 dataset and then increase the amount of data used in the calibration procedure to see if the simula-  
313 tion results and posterior parameter distributions convergence. For the first COVID-19 epidemic, we  
314 first calibrate the model using data until April 4th, 2020, and then extend the data range used in the  
315 calibration in two week increments until July 1st, 2020. During the second wave, we first calibrate  
316 the model on November 7th, 2020 and then extend the calibration to the date of schools re-opening  
317 on November 16th, 2020, the date of schools closing for Christmas holidays on December 18th, 2020  
318 and we finally calibrate on February 1st, 2021. By February 1st, 2021, the full impact of school clo-  
319 sure and decrease in work mobility during the holiday period is visible in the new hospitalizations.  
320 Extending the calibration beyond February 1st, 2021 is part of future research, as the emergence of  
321 more contagious strains and the national vaccination campaign need to be included from this point  
322 onward (Table 4). As previously mentioned, the effectivity of contacts in schools cannot be studied  
323 during the first COVID-19 wave because schools were only opened to a very limited extend before  
324 their final closure on July 1st, 2020.

325 **Parameters** The model parameters  $R_0$ ,  $l$ ,  $\tau$ ,  $\Omega_{\text{home}}$ ,  $\Omega_{\text{schools}}$ ,  $\Omega_{\text{work}}$  and  $\Omega_{\text{rest}}$  must be calibrated to the  
326 available hospitalization data. From Equation 14, the basic reproduction number depends on four  
327 model parameters,  $\beta$ ,  $\omega$ ,  $d_a$  and  $a_i$ . We calibrate  $\beta$ ,  $\omega$ ,  $d_a$  to hospitalization data, Since  $a_i$  is an age-  
328 stratified parameter, it consists of nine values rendering its calibration computationally unfeasible.  
329 The calibration of  $\beta$ ,  $\omega$  and  $d_a$  should allow sufficient degrees of freedom to obtain a robust estimate  
330 of the basic reproduction number without increasing the demand for computational resources too  
331 much. In total, nine parameters must be calibrated to hospitalization data.

332 **Data** The aim of the calibration procedure is to obtain a parameter set which leads to a good agree-  
333 ment between the model predictions and the observed data. We calibrate the nine aforementioned  
334 parameters to the timeseries of daily new hospitalizations ( $H_{\text{in}}$ ), which are available for download  
335 at <https://epistat.sciensano.be/Data>. The model is calibrated separately to the first and  
336 second COVID-19 waves in Belgium.

337 **Statistical model** Rather than using the method of least squares (Gaussian model), we aim to  
338 explicitly take into account the underlying uncertainty in the data. Since daily hospitalizations are  
339 discrete counts, the simplest statistical model describing the model output is the Poisson distribution.  
340 An attractive advantage of this distribution is that the variance of a Poisson-distributed random vari-  
341 able is the same as the expected value. The method of least squares inherently assumes the variance  
342 of the data are constant. In reality, because the magnitude of the hospitalizations during a COVID-19

## 2 MATERIALS AND METHODS

### 2.5 Effects of non-pharmaceutical interventions

343 wave varies significantly over time, so does the variance. We thus assume the data are independent  
 344 and identically distributed (i.d.d.) sequences of poisson variables. The resulting log-likelihood  
 345 function is,

$$\log L(\mathbf{y} | \mathbf{x}, \boldsymbol{\theta}) = - \sum_{i=1}^N \left[ y_i(\boldsymbol{\theta}) - x_i \log(y_i(\boldsymbol{\theta})) \right], \quad (19)$$

346 where the vector of parameters,  $\boldsymbol{\theta}$ , that maximizes the log-likelihood function must be found. In  
 347 Equation 19,  $\mathbf{y}$  denotes the vector of model predictions,  $\mathbf{x}$  denotes the timeseries of data and  $N$  rep-  
 348 represents the number of datapoints.

349 **Calibration procedure** The fitting procedure is performed in two steps. Maximising the result of  
 350 Equation 19 is computationally demanding and suffers from the presence of local maxima. We thus  
 351 need an efficient way to scan through the nine-dimensional parameter space  $\boldsymbol{\theta} = \{\beta, \omega, \dots, \Omega_{\text{rest}}\}$ .  
 352 A good technique to initially broadly identify the region where the global maximum is situated is  
 353 *Particle Swarm Optimisation* (PSO) [18]. When a region of interest has been identified, we use the  
 354 maximum-likelihood estimates as initial values for the ensemble sampler for Markov Chain Monte  
 355 Carlo (MCMC) proposed by Goodman and Weare [13]. For all parameters, uniform prior distribu-  
 356 tions were used.

### 357 2.5 Effects of non-pharmaceutical interventions

358 To better compare the effects of mobility changes on the daily number of new hospitalizations, we  
 359 compute the relative share of contacts and the effective reproduction number ( $R_e$ ) at home, in schools,  
 360 in workplaces and for the combination of leisure, public transport and other contacts. The number of  
 361 effective contacts in the aforementioned places at time  $t$  are equal to,

$$N_{c, \text{home}}^*(t) = \Omega_{\text{home}} N_{c, \text{home}}, \quad (20)$$

$$N_{c, \text{schools}}^*(t) = \Omega_{\text{schools}} H_{\text{schools}}(t) N_{c, \text{schools}}, \quad (21)$$

$$N_{c, \text{work}}^*(t) = \Omega_{\text{work}} G_{\text{work}}(t) N_{c, \text{work}}, \quad (22)$$

$$N_{c, \text{rest}}^*(t) = \Omega_{\text{rest}} \left[ G_{\text{transit}}(t) N_{c, \text{transport}} + G_{r \& r}(t) N_{c, \text{leisure}} + G_{g \& p}(t) N_{c, \text{others}} \right], \quad (23)$$

362 where  $N_{c, \text{home}}^*$ ,  $N_{c, \text{schools}}^*$ ,  $N_{c, \text{work}}^*$ ,  $N_{c, \text{rest}}^*$  denote the number of effective contacts at home, in schools,  
 363 at work or for the sum of leisure, public transport and other contacts. The relative share of contacts  
 364 in location  $x$  is computed as,

$$r_x(t) = \frac{N_{c, x}^*(t)}{N_{c, \text{home}}^*(t) + N_{c, \text{schools}}^*(t) + N_{c, \text{work}}^*(t) + N_{c, \text{rest}}^*(t)}. \quad (24)$$

365 The effective reproduction number for age group  $i$ , in place  $x$  and at time  $t$  is computed as,

$$R_{e, x, i}(t) = \frac{S_i(t)}{S_i(0)} (a_i d_a + \omega) \beta \sum_{j=1}^N N_{c, x, ij}^*(t), \quad (25)$$

366 Finally, the population average effective reproduction number in place  $x$  is computed as the weighted  
 367 average over all age groups using the demographics listed in Table 1.

## 368 3 Results

### 369 3.1 Hospitalization parameters

370 The average time from symptom onset to hospitalisation was 7.5 days (IQR 3.0 - 10.0 days). The  
371 average stay in the emergency room and/or buffer was 1.1 days (IQR: 0.2 - 1.2 days) and the average  
372 time between admission in cohort and admission in ICU was 1.3 days (IQR: 0.0 - 2.0 days). Of the  
373 348 hospitalised patients, 86 patients (24.7 %) required intensive care at some point during their stay  
374 and 262 (75.3 %) remained in cohort. The overall mortality in the hospital is 19.5 %, the mortality in  
375 cohort was slightly lower at 16.8 % and the mortality in ICU was higher (27.9 %). The average length  
376 of the stay in a cohort ward was 7.7 days (IQR: 4.0 - 10.0 days) and the average length of an ICU stay  
377 was 12.5 days (2.9 - 17.9 days) ( $p = 0.05$ ). The average cohort stay was 8.0 days (IQR: 4.2 - 10.9 days)  
378 if the patient had recovered and 6.1 days (IQR: 3.0 - 7.6 days) if the patient had died ( $p = 0.007$ ). The  
379 average ICU stay was 9.9 days (IQR: 2.0 - 14.0 days) if the patient had recovered and 19.3 days (IQR:  
380 7.9 - 23.8 days) if the patient had died ( $p = 0.001$ ). Out of 62 surviving patients in ICU, 46 stayed in a  
381 cohort ward after their stay in ICU, with an average length of stay of 11.7 days (IQR: 6.0 - 13.3 days).  
382 A violin representation of the residence time distributions can be found in Figure 9. The computed  
383 age-stratified hospitalization parameters  $c$ ,  $m_C$  and  $m_{ICU}$ , are listed in Table 2. From the sample sizes  
384 it can be deduced that older individuals have a much higher chance of hospitalization than younger  
385 individuals. In general, both the chance of needing intensive care and the mortalities increase with  
386 the patient's age. In the dataset, no individuals under 30 years old were in need of intensive care and  
387 no individuals under 40 year old have died in the hospital from a SARS-CoV-2 infection. Hence,  
388 the mortalities in cohort and ICU,  $m_C$  and  $m_{ICU}$ , are equal to 0.0 % for individuals under 40 years  
389 old. This will not impact the goodness-of-fit to the Belgian hospitalization data, but care is warranted  
390 when using these data to perform health economic evaluations such as computing *quality adjusted life*  
391 *years* lost to COVID-19. The age-stratified mortalities, age-stratified distributions between cohort and  
392 ICU and the residence time distributions derived from the hospital dataset were propagated in the  
393 model, resulting in a good prediction of the total number of patients in Belgian hospitals during both  
394 2020 COVID-19 waves (Figure 10).

395

### 396 3.2 Model calibration

397 The population average basic reproduction number was computed as  $R_0 = 4.16$  (IQR: 3.90 - 4.39)  
398 for the first 2020 COVID-19 wave and as  $R_0 = 3.69$  (IQR: 3.64 - 3.75) for the second 2020 COVID-19  
399 wave. Compliance to social measures were similar for both 2020 COVID-19 waves, with an average  
400 delay of 0.22 (IQR: 0.07-0.31) and 0.39 (IQR: 0.20 - 0.52) days, and a time to reach full compliance to  
401 measures of 9.17 (IQR: 8.89 - 9.50) and 6.94 (IQR: 6.71 - 7.18) days respectively.

402

403 Figure 4 summarizes the results of six model calibrations using hospitalization datasets starting on  
404 March 15th, 2020 until April 4th, 2020 and subsequently increasing in two week increments. Here,  
405 Figure 4 (a) represents the minimal dataset, where the data range used for the calibration was equal  
406 to March 15th, 2020 until April 4th, 2020. Opposed is Figure 4f, which uses the maximal dataset,  
407 using hospitalization data from March 15th, 2020 until July 1st, 2020. Using the minimal dataset

### 3 RESULTS

#### 3.2 Model calibration

**Table 2:** Computed fraction of hospitalized remaining in cohort and not transferring to ICU ( $c$ ), mortality in cohort ( $m_C$ ) and mortality in ICU ( $m_{ICU}$ ) per age group for two Belgian hospitals ( $n = 370$ ).

| Age group (years) | sample size | $c$ (%) | $m_C$ (%) | $m_{ICU}$ (%) |
|-------------------|-------------|---------|-----------|---------------|
| [0, 10[           | 2           | 100.0   | 0.0       | 0.0           |
| [10, 20[          | 7           | 100.0   | 0.0       | 0.0           |
| [20, 30[          | 9           | 80.0    | 0.0       | 0.0           |
| [30, 40[          | 9           | 87.5    | 0.0       | 0.0           |
| [40, 50[          | 33          | 78.1    | 8.0       | 14.3          |
| [50, 60[          | 67          | 74.2    | 2.2       | 6.3           |
| [60, 70[          | 62          | 61.3    | 0.0       | 16.7          |
| [70, 80[          | 74          | 64.3    | 17.8      | 44.0          |
| [80, $\infty$ [   | 107         | 88.2    | 36.7      | 58.3          |
| <b>Average</b>    | 370         | 75.3    | 16.8      | 27.9          |

408 (Figure 4a), the posterior distributions are uninformative and model prediction uncertainty is large.  
409 Using additional data from April 15th, 2020 (Figure 4b) onwards, the model captures the observed  
410 downward trend in the hospitalization data. Before the release of social restrictions on May 4th, 2020  
411 (Figure 4a-4c), the posterior distributions seem to converge to distributions different from the ones  
412 found using the maximal dataset (Figure 4f). However, during the gradual lifting of lockdown restric-  
413 tions (Figure 4d-4f), the posterior distributions monotonically converge to their final distributions.

414

415 In a similar fashion, four calibrations on hospitalization datasets of increasing length during the sec-  
416 ond COVID-19 wave were performed and the results are summarized in Figure 5. Once more, the  
417 minimal dataset (Figure 5a), which uses data from September 1st, 2020 until November 7th, 2020  
418 does not result in informative posterior distributions of the effectivity parameters. Uncertainty on  
419 the model prediction is large, but the mean model prediction is ballpark accurate. As soon as schools  
420 are opened on November 16th, 2020, the daily hospitalizations evolve to a plateau. In spite of large  
421 uncertainty on the model prediction, the emergence of the hospitalization plateau is captured in the  
422 uncertainty band, and the model thus provides a ballpark estimate using the minimal dataset. Al-  
423 though model accuracy has risen, a similar conclusion can be drawn for the calibration using data  
424 until schools re-opening on November 16th, 2020. When including data in the hospitalization dataset  
425 until schools closure for the Christmas holidays on December 18th, 2020 (Figure 5c), the model cor-  
426 rectly attributes the increased transmission to the opening of schools. In Figure 5c, it can be seen  
427 that the the effectivity parameter for schools is almost equal to the maximum value of one. Although  
428 the posteriors of the effectivity parameters still differ significantly from their final distributions, the  
429 model provides an accurate prediction for the future evolution of the new hospitalizations during  
430 Christmas holidays and until schools re-opening on January 4th, 2021. From the inference using the  
431 maximal dataset (Figure 5d), it is clear that the model attributes high effectivities for contacts at home  
432 and in schools.

433

### 434 3.3 Effects of non-pharmaceutical interventions

435 To better compare the effects of non-pharmaceutical interventions between both 2020 COVID-19  
436 waves, we computed the relative share of contacts and the effective reproduction number at home,  
437 in schools, in workplaces and for the sum of leisure, public transport and other contacts (Figure 6).  
438 In this way, we are able to dissect the force of infection in our model, allowing us to assess the relative  
439 impact of contacts made at different locations on SARS-CoV-2 transmission. In prepandemic times,  
440 leisure and work contacts account for the bulk of total contacts, while under strict lockdown mea-  
441 sures (March 15th, 2020 - May 4th, 2020 and October 19th, 2020 - November 16th, 2020), the contacts  
442 at home are the main driver of SARS-CoV-2 spread. The effective reproduction number under strict  
443 lockdown measures was equal to  $R_e = 0.67$  (IQR: 0.48 - 0.76) for the first COVID-19 epidemic and was  
444 equal to  $R_e = 0.66$  (IQR: 0.61 - 0.69) for the second COVID-19 epidemic. Aside from the interactions  
445 at home, leisure contacts had the second most impact during the first COVID-19 wave, with roughly  
446 twice the impact of work contacts. When lifting social restrictions from May 4th, 2020 onwards, the  
447 relative contribution of home contacts gradually declines, while the contributions of work and leisure  
448 become more important. The effective reproduction number gradually increases and approaches the  
449 critical value of  $R_e = 1$  by the beginning of summer (average of June, 2020  $R_e = 0.91$ , IQR: 0.77 - 1.00).

450

451 As soon as schools are re-opened on November 16th, 2020, a plateau in the daily number of hospi-  
452 talizations emerges (Figure 6). There were no other major policy changes around this time, except  
453 schools re-opening. Our model deduces this correlation by inferring posterior values of the effec-  
454 tivity of contacts in schools close to one, meaning school contacts were highly effective for SARS-  
455 CoV-2 transmission. Schools have an impact similar to the home interactions, with both contributing  
456 roughly 40 % to the total number of effective contacts during the second COVID-19 wave. It is clear  
457 that the opening of schools under lockdown can tip the scale, and push the effective reproduction  
458 number just above the critical value of  $R_e = 1$ . When schools are opened, the effective reproduction  
459 number increases from  $R_e = 0.66 \pm 0.04$  to  $R_e = 1.09 \pm 0.05$ , causing a stagnation in the decline  
460 of the daily hospitalizations. To further validate this result, we extracted the number of laboratory  
461 confirmed cases in youths  $[0, 20[$ , the working population  $[20, 60[$  and the senior population  $[60, \infty[$   
462 from the *Belgian Scientific Institute of Public Health* (Sciensano). The timeseries were normalized with  
463 the number of cases on November 21st, 2020<sup>1</sup> to allow a better comparison. The number of labora-  
464 tory confirmed cases amongst youths start increasing as soon as schools are opened on November  
465 16th, 2020 (Figure 3). A similar pattern is observed during school closure and re-opening for Christ-  
466 mas holidays, although it should be noted the relationship is less clear. This is most likely the effect  
467 of Christmas and New Year celebrations and returning travellers. The use of a time-lagged cross-  
468 correlation revealed a significant lead-relationship between the number of cases in youths and the  
469 working population by 9 days, and a leading relationship between the number of cases amongst  
470 youths and the senior population by 13 days (Section 7.5).

471

---

<sup>1</sup>Date of school reopening 2021-11-16 plus one five day incubation period.



## 4 DISCUSSION

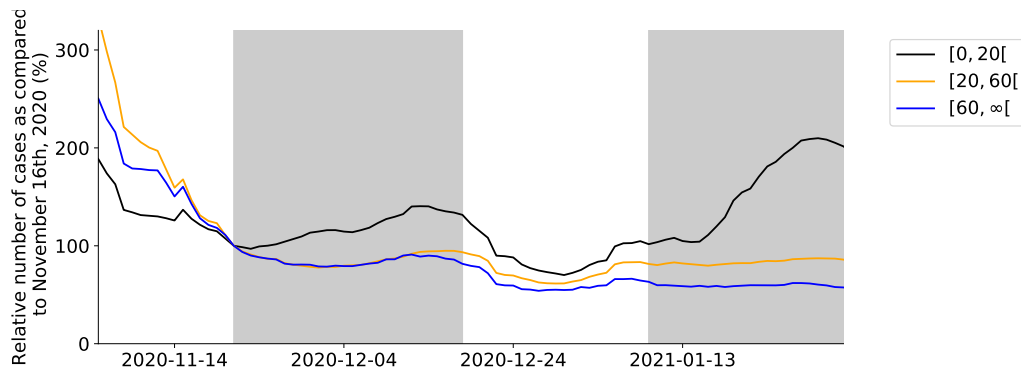

**Figure 3:** Relative number of confirmed cases in youths, the working population and the senior population during the period November 2nd, 2020 until February 1st, 2021, as compared to the number of confirmed cases in each group on November 16th, 2020. The grey shade is used to indicate schools were open.

## 472 4 Discussion

473 We computed hospitalization parameters using data from two hospitals in Ghent. The ICU admission  
474 probabilities and mortalities in cohort and in ICU indicate that COVID-19 has a much higher severity  
475 in older individuals, which is in line with estimates from authors in the USA and China [5, 36]. The  
476 average time from symptom onset to hospitalisation was 7.5 days, which is in line with estimates  
477 from Linton et al. [23]. Of the 348 hospitalized patients, 86 patients (24.7 %) required intensive care at  
478 some point during their stay and 262 (75.3 %) remained in cohort. The result is in line with the esti-  
479 mate of Wu and McGoogan [46], who estimated that one quarter of all hospitalized patients requires  
480 intensive care. The inferred hospitalization parameters are valuable proxies for Belgium and resulted  
481 in an adequate goodness-of-fit to the total number of patients in Belgian hospitals.

482  
483 We obtained an average basic reproduction number of  $R_0 = 4.16$  (IQR: 3.90 - 4.39) for the first 2020  
484 COVID-19 wave and of  $R_0 = 3.69$  (IQR: 3.64 - 3.75) for the second 2020 COVID-19 wave, which is in  
485 line with the global consensus range of  $R_0 = [2, 4]$ . The estimate for the second COVID-19 wave is  
486 slightly lower, and this is most likely because this estimate implicitly includes the effects of preventive  
487 measures and mentality changes that were gradually adopted during the first 2020 COVID-19 wave.  
488 Large differences in the basic reproduction number exist between the different age groups (Figure 7).  
489 It is clear that the youths and working-aged population drive the pandemic while people of ages 70  
490 or above can hardly sustain a SARS-CoV-2 pandemic amongst themselves, this is mainly because el-  
491 derly individuals have limited social interactions (Figure 7). Still, these individuals make up roughly  
492 35 % of all hospitalizations. The biggest risk group are the individuals aged 50 to 70, which make  
493 up roughly 50 % of the expected hospitalizations. The high expected fraction of hospitalizations in  
494 this age group is due to a trade-off between social contact and hospitalization risk. These individ-  
495 uals have of plenty social contact and at the same time, have a high propensity to hospitalization.  
496 The compliance to social measures were similar between the both 2020 COVID-19 waves, little lag  
497 was observed (0.22 vs. 0.39 days) and the time to reach full compliance were of the same magnitude

4 DISCUSSION

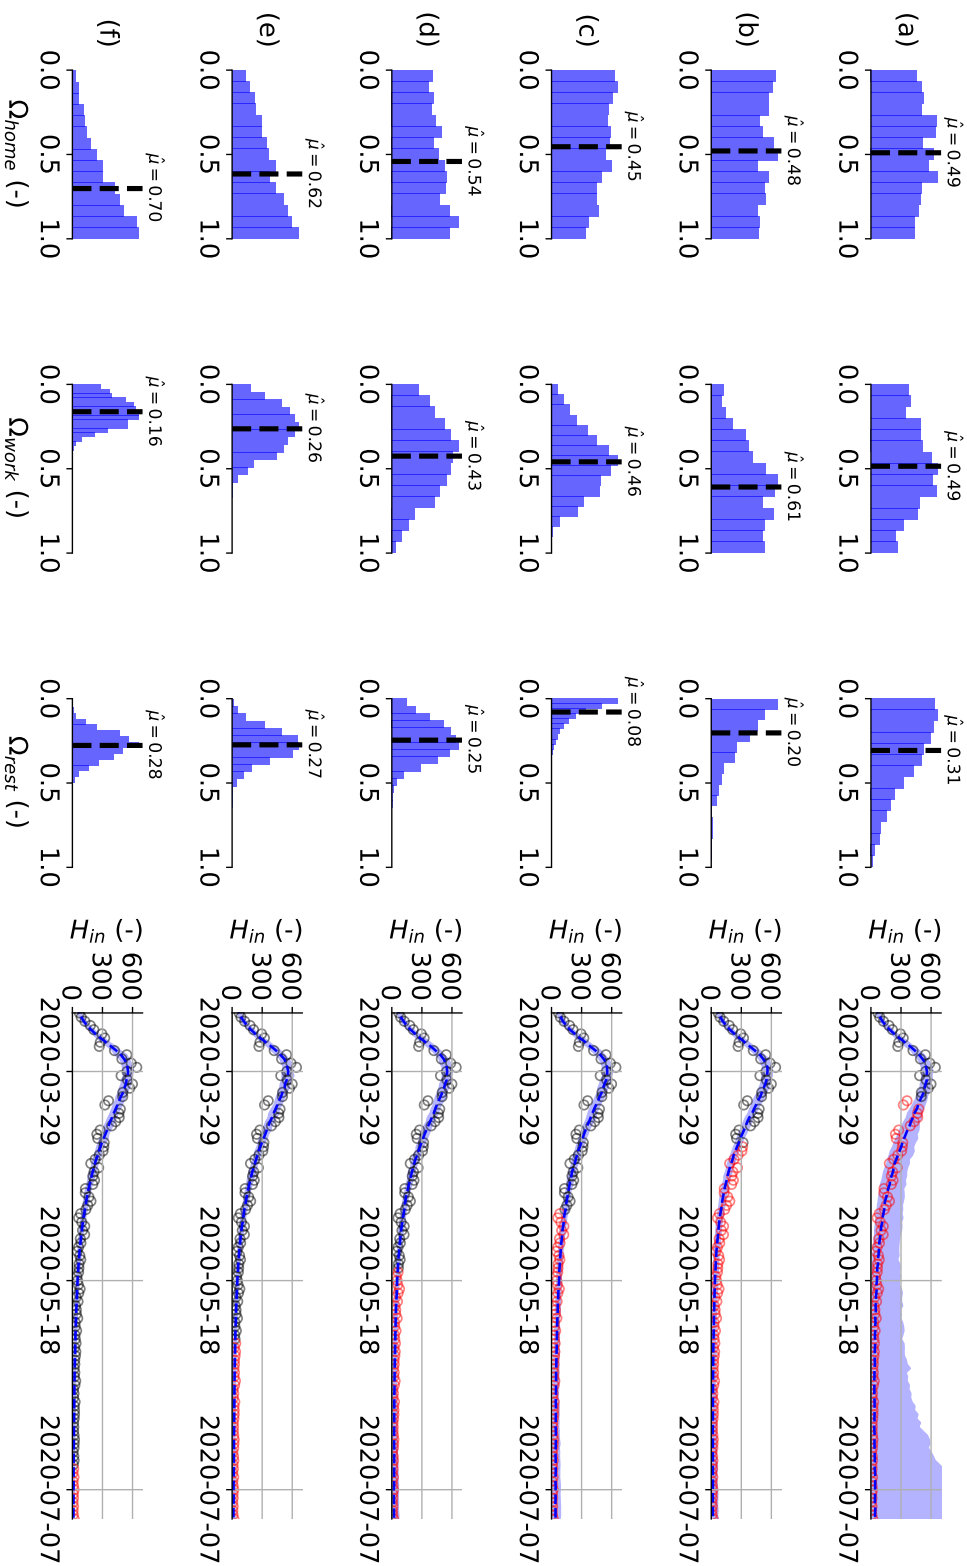

**Figure 4:** (left) Estimated posterior distributions for the effectivity of a contact at home ( $\Omega_{home}$ ), in the workplace ( $\Omega_{work}$ ) and for the sum of leisure activities, other activities and public transport ( $\Omega_{rest}$ ), (right) together with the resulting model prediction for the daily hospitalizations from March 15th, 2020 until July 14th, 2020 (right). The effectivity of school contacts could not be deduced during the first 2020 COVID-19 wave because schools were only re-opened very limited before their final closure on July 1st, 2020. Calibration performed using the daily hospitalizations in Belgium until: (a) 2020-04-04, (b) 2020-04-15, (c) 2020-05-01, (d) 2020-05-01, (e) 2020-06-01 and (f) 2020-07-01. Calibration data in black, validation data in red. Model predictions are accurate in all but the minimal calibration dataset (a). Monotonic convergence of the effectivity parameter posteriors is reached quickly after lockdown release on May 4th, 2020 (d-f).

## 4 DISCUSSION

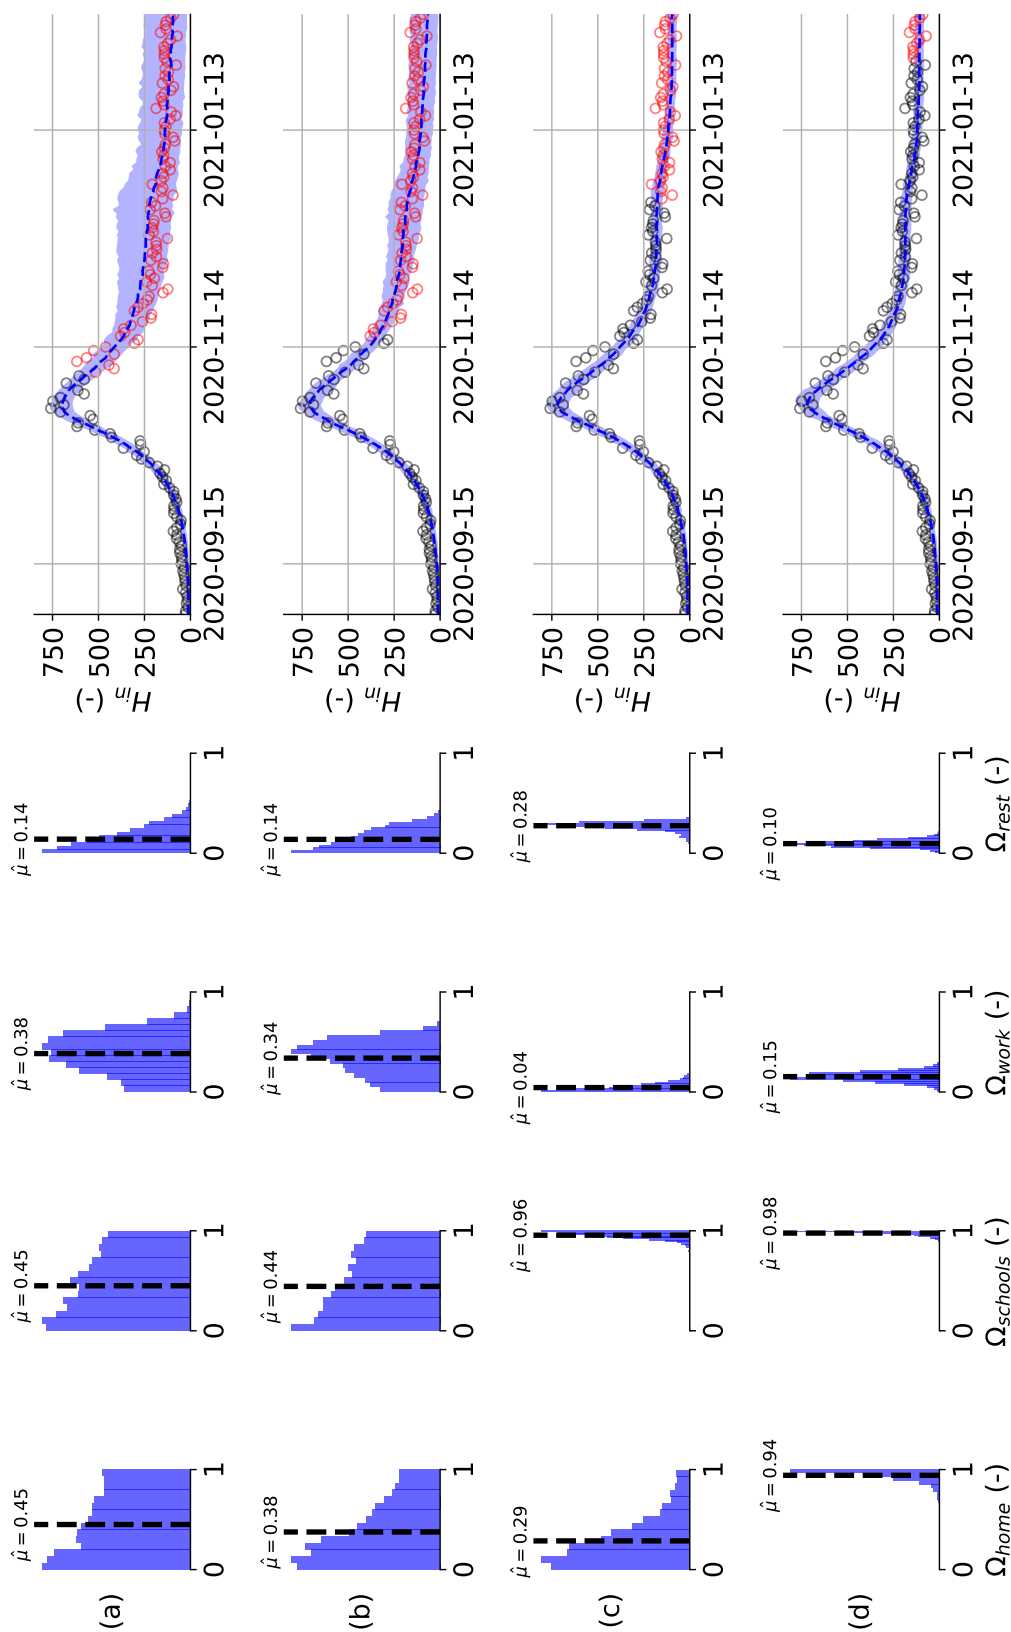

**Figure 5:** Estimated posterior distributions for the effectivity of a contact at home ( $\Omega_{\text{home}}$ ), at school ( $\Omega_{\text{schools}}$ ), in the workplace ( $\Omega_{\text{work}}$ ) and for the sum of leisure activities, other activities and public transport (left), together with the resulting model prediction for the daily hospitalizations from September 1st, 2020 until February 14th, 2021 (right). Calibration performed using the daily hospitalizations in Belgium until: (a) 2020-11-07, (b) 2020-11-16, (c) 2020-12-18, (d) 2021-02-01. Calibration data in black, validation data in red. Model predictions are accurate for all calibration datasets. Monotonic convergence of the schools effectivity parameter is reached a-posteriori schools re-opening (c).

4 DISCUSSION

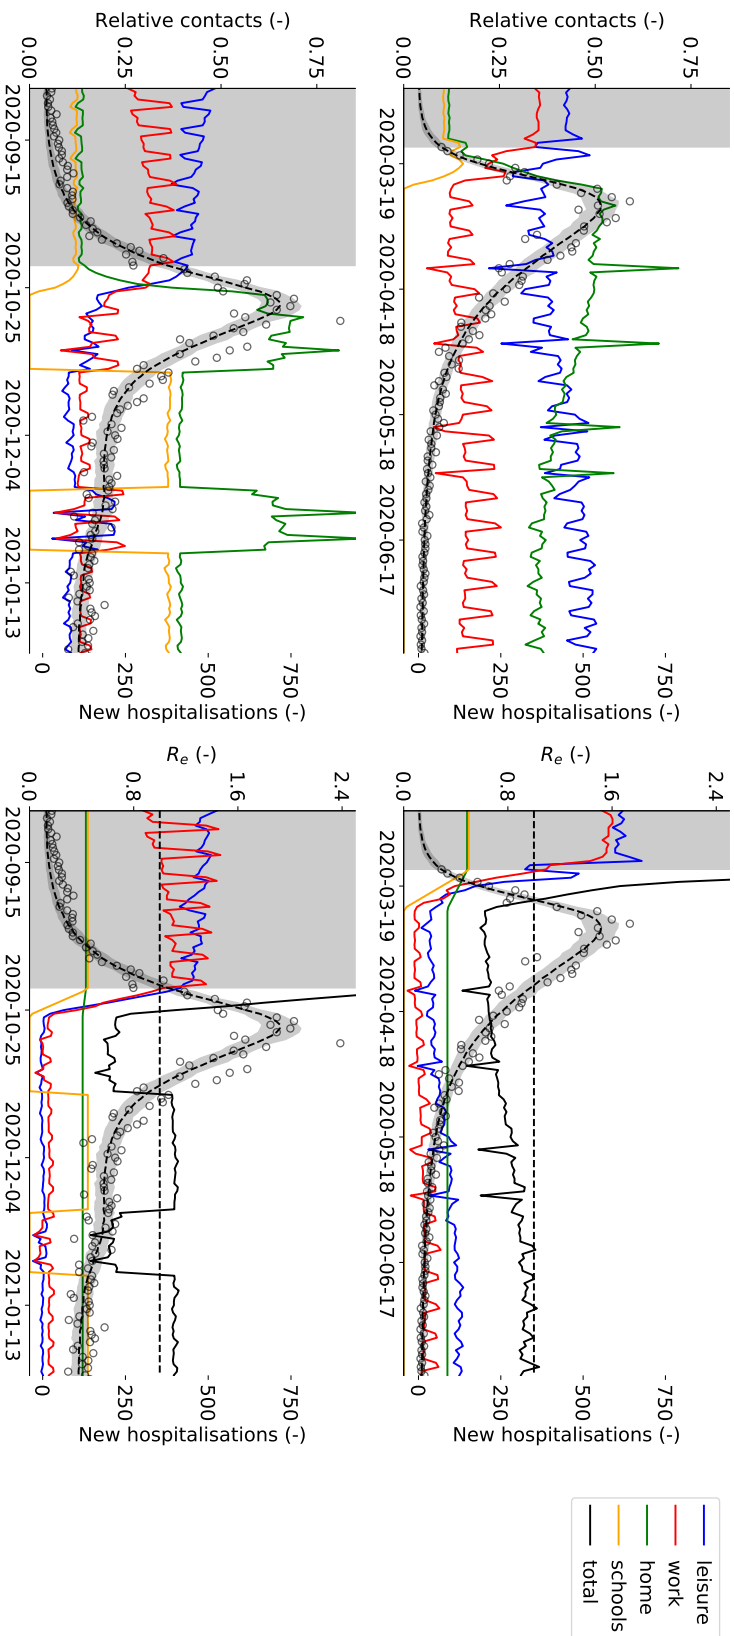

**Figure 6:** (First column) Relative share of contacts at home, in the workplace, in schools and for the sum of leisure activities, (Second column) effective reproduction number ( $R_e$ ) at home, in the workplace, in schools and for the sum of leisure activities, other activities and public transport. The right axis denotes the predicted number of daily Belgian hospitalizations. The first row depicts the first COVID-19 wave in Belgium, from March 15th, 2020 until July 14th, 2020, while the second row depicts the second COVID-19 wave in Belgium, from September 1st, 2020 until February 1st, 2021. Mean and 95 % confidence interval of 1000 model realisations. During both lockdowns, home interactions have the largest share of effective contacts. During lockdown release, the relative importance of work and leisure contacts start increasing. Schools opening and closing has a large impact on the effective reproduction number, and can end a decreasing trend in hospitalizations.

## 4 DISCUSSION

498 (9.17 vs 6.94 days). Thus, compliance to lockdown restrictions can be modeled using a ramp function  
 499 without lag, eliminating one of the model's parameters, namely  $\tau$  (Equation 18).  
 500

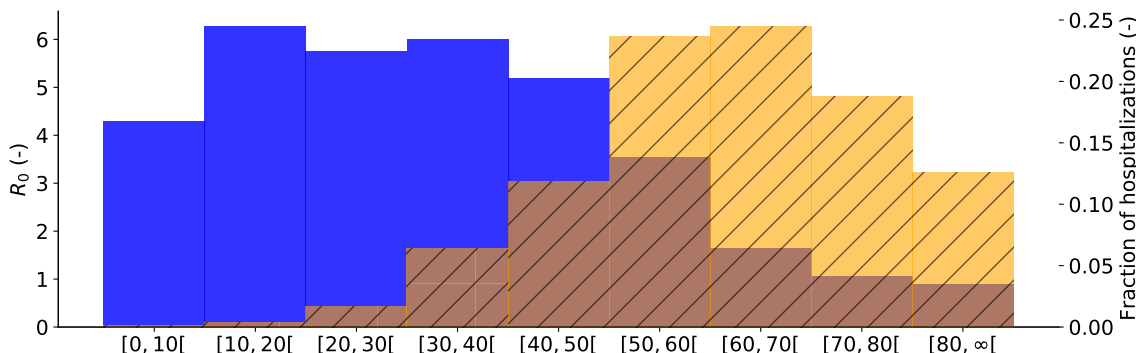

**Figure 7:** Basic reproduction number per age group ( $R_{0,i}$ ), for Belgium (blue). Expected fraction of the total Belgian hospitalizations during the first COVID-19 wave, as predicted by the model, from March 15th, 2020 until July 1st, 2020 in age group  $i$  (orange, striped). Youths and working-aged population drive the pandemic, while the senior population is mostly in need of hospital care.

501 We calibrated the model's effectivity parameters ( $\Omega_{\text{home}}$ ,  $\Omega_{\text{schools}}$ ,  $\Omega_{\text{work}}$ ,  $\Omega_{\text{rest}}$ ) on incrementally larger  
 502 hospitalization datasets and found that the model provides accurate forecasts under the observed  
 503 mobility changes, even when the posteriors still depend on the extent of the dataset. However, *cor-*  
 504 *rect*<sup>2</sup> effectivity parameters could only be deduced a posteriori events. This is because *information* on  
 505 the effectiveness of contacts can only be obtained by observing the hospitalizations under changing  
 506 policies. Examples are the effects of leisure and work relaxations during the first COVID-19 wave and  
 507 the effect of schools re-opening during the second COVID-19 wave. From April 15th, 2020 onwards  
 508 (Figure 4, panel b) the ever decreasing trend in the daily hospitalizations is nicely captured even with  
 509 posteriors seemingly converging to distributions different than those of the maximal dataset (panel f).  
 510 In spite, on May 1st 2020 (panel c), the model could have been used to accurately inform policymak-  
 511 ers on the effects of lifting work and leisure restrictions just four days later. As soon as restrictions  
 512 are lifted, the posteriors quickly converge to their final distributions. A similar observation is made  
 513 with regard to the schools effectivity parameter. From November 7th, 2020 onwards (Figure 5, panel  
 514 a) the effect of schools re-opening is captured in the model uncertainty, in spite of deviant posterior  
 515 distributions. From December 18th, 2020 onwards (panel c) the effect of schools re-opening is cap-  
 516 tured both in the model predictions and the effectivity parameters. Because accurate posteriors can  
 517 only be inferred a posteriori, the modeler must assess if policy changes have been sufficient to deduce  
 518 accurate effectivity posteriors. This is important when performing scenario analysis, as incomplete  
 519 knowledge of the effectivity posterior can significantly alter the results. Our calibration method al-  
 520 lows to extract the most out of pre-pandemic contact studies and publically available mobility data,  
 521 and has proven useful to inform policy makers during the acute crisis.

<sup>2</sup>Assuming the inferred posterior distributions of the maximal dataset are correct.

522

523 Finally, we would like to further discuss the importance of schools in the SARS-CoV-2 pandemic.  
524 As previously mentioned in section 3.3, there seems to be a strong correlation between school re-  
525 opening, the rise of laboratory confirmed cases amongst youths, the rise of the number of clusters  
526 in schools, and the emergence of plateaus in the daily hospitalizations (Figures 3 and 6). Our model  
527 incorporates this correlation as high effectivities of school contacts. An increase in the effective repro-  
528 duction number, from  $R_e = 0.66 \pm 0.04$  to  $R_e = 1.09 \pm 0.05$ , is observed when schools are re-opened.  
529 Although the present evidence is circumstantial, and correlation does not imply causation, schools  
530 seem to play a critical role in SARS-CoV-2 spread. Thus, schools closure is an effective way of coun-  
531 tering an epidemic SARS-CoV-2 trend. However, given the negative consequences of school closure,  
532 we recommend policymakers to invest in ways to ensure qualitative online education during future  
533 SARS-CoV-2 outbreaks, but even more generally, in case of a future pandemic.

## 534 5 Conclusions

- 535 • We obtained an average basic reproduction number of  $R_0 = 4.16$  (IQR: 3.90 - 4.39) and  $R_0 =$   
536  $3.69$  (IQR: 3.64 - 3.75) for both 2020 COVID-19 waves in Belgium. We found that SARS-CoV-  
537 2 strongly discriminates between individuals of different age groups, with youths and the  
538 working-aged population driving the pandemic, and the senior population needing hospital  
539 care. These results are in line with the established consensus and highlight the model's va-  
540 lidity.
- 541 • The combination of the deterministic epidemiological model, which incorporates a-priori knowl-  
542 edge on disease dynamics, and the social contact model whose infectivity parameters were  
543 inferred allow us to make the most out of the available pre-pandemic data. The method is  
544 computationally cheap and does not require ad-hoc tweaking to obtain a good fit to the ob-  
545 served data. A disadvantage is that the effectivity parameter distributions only monotonically  
546 converge to their *correct* posterior distributions a posteriori policy changes. Still, the model is  
547 able to make accurate predictions on the daily number of hospitalizations under the observed  
548 mobility, but care by the modeller is warranted when performing scenario analysis.
- 549 • As soon as schools were re-opened on November 16th, 2020, the number of confirmed cases  
550 amongst youths starts increasing. A significant lead relationship between the number of cases  
551 amongst youths and the working population, and youths and the senior population was found.  
552 Our model incorporates this correlation as high effectivities of school contacts. When schools  
553 were re-opened under lockdown policies, the model indicates the effective reproduction num-  
554 ber increased from  $R_e = 0.66 \pm 0.04$  to  $R_e = 1.09 \pm 0.05$ . Thus, schools closure is an effective  
555 measure to counter an epidemic SARS-CoV-2 trend.

## 556 6 Future research

- 557 • The calibration procedure should be repeated using pandemic social contact matrices, which  
558 are currently being gathered for Belgium by Coletti et al. [6]. Further, the effects of integrat-  
559 ing the contacts with their duration should be explored. A comparison between the different  
560 results can then be made.

## 6 FUTURE RESEARCH

---

- 561 • The effective reproduction number in the different places should be compared to data on SARS-  
562 CoV-2 clusters to further validate the model.
- 563 • It is expected that lockdown measures in Belgium will be lifted soon. The impact of releasing  
564 measures on the daily hospitalizations should be studied to find a link between the effectivity  
565 parameters and the mobility reductions.
- 566 • If schools are a major contributor to SARS-CoV-2 spread, administering a vaccine with high  
567 transmission-blocking potential to youths is expected to have a similar effect as schools closure.  
568 Due to their localized nature, vaccination for SARS-CoV-2 in schools is logistically easier than  
569 vaccinating the general population.

## 570 Acknowledgements

571 This work is the result of a team effort. I want to thank Bram De Jaegher, Daan Van Hauwermeiren,  
572 Stijn Van Hoey and Joris Van den Bossche for their help in maintaining the GitHub repo, coding the  
573 visualizations and for teaching me the basics of object-oriented programming in Python. I would  
574 like to thank Mieke Descheppere, statistician at the Ghent University hospital and Wim Verbeke,  
575 MD from AZ Delta Roeselare, for sharing their insights on hospital dynamics. I would like to thank  
576 prof. Steven Callens, MD, prof. Pascal Coorevits, MD and prof. Ernst Nietzsche, MD of the Ghent  
577 university hospital and Leen Van Hoeymissen from AZ Maria Middelaers for sharing their data. We  
578 thank VZW 100 km Dodentocht Kadee for their financial support through the organisation of the  
579 2020 100 km COVID-Challenge.

## 580 Competing interests

581 The authors have no competing interests to declare.

## 582 Role of the funding source

583 This work was supported by the UGent *Special Research Fund* and by the *Research Foundation Flan-*  
584 *ders* (FWO), project number G0G2920N. Further, the computational resources and services used in  
585 this work were also provided by the VSC (*Flemish Supercomputer Center*), funded by FWO and the  
586 Flemish Government. The funding sources played no role in study design; in the collection, analysis  
587 and interpretation of data; in the writing of the report; and in the decision to submit the article for  
588 publication.

## 589 CRediT author statement

590 **Tijs W. Alleman:** Conceptualization, Software, Methodology, Investigation, Data Curation, Writing  
591 - Original Draft. **Jenna Vergeynst:** Conceptualization, Software, Writing - Review. & Editing, Project  
592 administration. **Lander De Visscher:** Methodology. **Michiel Rollier:** Methodology, Writing - Re-  
593 view. **Elena Torfs:** Conceptualization, Funding acquisition. **Daniel Illana:** Visualization. **Ingmar**

## 6 *FUTURE RESEARCH*

---

594 **Nopens:** Conceptualization, Funding acquisition, Project administration, Writing - Review. & Edit-  
595 ing **Jan Baetens:** Conceptualization, Funding acquisition, Project administration, Writing - Review &  
596 Editing.



## *7 SUPPLEMENTARY MATERIALS*

---

### 597 **7 Supplementary materials**

#### 598 **7.1 Overview of model parameters**

7.1 Overview of model parameters

7 SUPPLEMENTARY MATERIALS

**Table 3:** Overview of simulation parameters used in the age-stratified extended SEIQRD model.

| Symbol            | Parameter                                                                                                                                                                       | Value      | Unit              | Reference          |
|-------------------|---------------------------------------------------------------------------------------------------------------------------------------------------------------------------------|------------|-------------------|--------------------|
| $a$               | subclinical fraction per age group                                                                                                                                              | Table 1    | (-)               | Davies et al. [8]  |
| $h$               | fraction of mildly infected individuals requiring hospitalisation                                                                                                               | Table 1    | (-)               | Verity et al. [36] |
| $c$               | fraction of hospitalisations requiring ICU transfer                                                                                                                             | Table 2    | (-)               | Hospital dataset   |
| $d_a$             | duration of subclinical infection                                                                                                                                               | 4.1        | days              | Inferred           |
| $d_m$             | duration of mild infection                                                                                                                                                      | 7          | days              | To et al. [35]     |
| $d_{hosp}$        | average time from symptom onset to hospitalization                                                                                                                              | 7.5        | days              | Hospital dataset   |
| $d_{ER}$          | time spent in the emergency room and/or in a buffer ward                                                                                                                        | 2.5        | days              | Hospital dataset   |
| $d_{c,R}$         | length of cohort stay if recovered                                                                                                                                              | 8.0        | days              | Hospital dataset   |
| $d_{c,D}$         | length of cohort stay if deceased                                                                                                                                               | 6.1        | days              | Hospital dataset   |
| $d_{ICU,R}$       | length of ICU stay if recovered                                                                                                                                                 | 9.9        | days              | Hospital dataset   |
| $d_{ICU,D}$       | length of ICU stay if deceased                                                                                                                                                  | 19.3       | days              | Hospital dataset   |
| $d_{ICU,rec}$     | length of recovery and observation stay in cohort after ICU stay                                                                                                                | 6.5        | days              | Hospital dataset   |
| $m_C$             | mortality in cohort                                                                                                                                                             | Table 2    | (-)               | Hospital dataset   |
| $m_{ICU}$         | mortality in ICU                                                                                                                                                                | Table 2    | (-)               | Hospital dataset   |
| $\sigma$          | length of latent period                                                                                                                                                         | 4.9        | days              | Computed           |
| $\omega$          | length of presymptomatic infectious period                                                                                                                                      | 0.3        | days              | Inferred           |
| $\sigma + \omega$ | length of incubation period                                                                                                                                                     | 5.2        | days              | Liu et al. [25]    |
| $\beta$           | probability of infection upon contact with an individual capable of transmitting SARS-CoV-2 under the assumption that the infectee is 100 % susceptible to SARS-CoV-2 infection | 0.073      | (-)               | Inferred           |
| $T_0$             | total population                                                                                                                                                                | Table 1    | people            | StatBEL [34]       |
| $N_c$             | contact matrix                                                                                                                                                                  | 9x9 matrix | day <sup>-1</sup> | Willem et al. [43] |

## 7 SUPPLEMENTARY MATERIALS 7.2 Overview of model assumptions and limitations

### 599 7.2 Overview of model assumptions and limitations

600 The following assumptions were made with regard to the SEIQRD dynamics:

- 601 1. All individuals experience a brief presymptomatic, infectious period.
- 602 2. All individuals are equally susceptible to SARS-CoV-2 infection.
- 603 3. Asymptomatic and mild cases automatically lead to recovery and in no case to death.
- 604 4. Mildly infected and hospitalized individuals cannot infect susceptibles (= *quarantined*). Thus,  
605 the model cannot be used to model the effect of transmission to healthcare workers.
- 606 5. All deaths come from hospitals, meaning no patients died outside a hospital [14].
- 607 6. Both 2020 COVID-19 waves were fitted separately, assuming a fully susceptible population.

608 The following assumptions to the hospital dynamics were made:

- 609 1. All patients spend time in the emergency room and/or buffer ward before going to either a  
610 cohort ward or an ICU.
- 611 2. After the emergency room and/or buffer ward, patients immediately branch into ICU or co-  
612 hort. In real life, a patient may first spend some time in a cohort ward before going to an ICU  
613 and this is not accounted for.
- 614 3. Residence times in cohort and in ICU differ depending on the outcome of the infection (recov-  
615 ered or deceased).
- 616 4. All recovered ICU patients spend some additional time in cohort (recovery and observation  
617 stay).

618 The following assumptions were made in the social contact model:

- 619 1. Prepandemic contact matrices by Willem et al. [43] are scaled with mobility reductions ex-  
620 tracted from the *Google Community Mobility Reports* and an effectivity parameter inferred from  
621 hospitalization data using a *Markov-Chain Monte-Carlo* method in order to mimic pandemic  
622 social behaviour.
- 623 2. The pre-pandemic contact matrices used included all contacts, both physical and non-physical,  
624 and the duration of contacts is not integrated.
- 625 3. The effectivity of the contacts ( $\Omega_x$ ) are bound between zero and one. This implies that if work  
626 mobility is reduced to 40 % of its pre-pandemic value, the work contacts can account for no  
627 more than 40 % of their pre-pandemic value.
- 628 4. There is no link between the effectivity parameters and the mobility reduction. However, when  
629 relaxing measures, an increase in mobility will likely be accompanied by an increase of the  
630 effectiveness of the contacts. This is due to mentality changes upon relaxation, as measures  
631 will gradually be ignored more.

632 **7.3 Key events**

633 The first lockdown, which started on March 15th, 2020 and lasted until May 4th, 2020 involved the  
634 closure of schools, bars, clubs, restaurants, all non-essential shops and a closure of border to non-  
635 essential travel (Table 4). The *Community Mobility Reports* show a 56 % reduction in workplace mo-  
636 bility (Figure 2 and Table 4). Based on surveys from the Belgian National Bank, 28.6 % of all em-  
637 ployees was able to work from home, 29.9 % remained in the workplace and 4.4 % worked both  
638 from home and in the workplace. 32.4 % were temporary unemployed and 4.8 % were absent [40].  
639 Public transport mobility decreased by 65 %, leisure mobility decreased by 72 % and grocery & phar-  
640 macy mobility was reduced by 26 %. From March 15th, 2020 until May 4th, 2020, mobility remained  
641 practically constant at the aforementioned reductions. On May 4th, 2020 the lockdown was gradu-  
642 ally lifted by re-opening all non-essential shops and lifting telework restrictions. The effect can be  
643 seen in the *Google Community Mobility Reports* (Figure 2), by the end of April, workplace and retail &  
644 recreation mobility gradually start increasing. By July 1st, 2020, almost all social measures had been  
645 lifted. During the first lockdown, schools remained fully closed until May 18th, 2020 and were only  
646 re-opened to a very limited extent before the end of the school year on July 1st, 2020. For this reason,  
647 schools are assumed to remain closed during the first COVID-19 wave. During July, there were little  
648 social restrictions, and this resulted in new, localized infection clust. During most of August 2020, a  
649 lockdown with curfew was imposed in Belgium’s Antwerp province. We do not attempt to model  
650 the hospitalizations during July and August 2020, as modelling localized infection clusters with a  
651 nation-level epidemiological model can only be accomplished by sever ad-hoc tweaks in the social  
652 contact model. A spatial model extension was developed to account for such localized phenomena.

653  
654 During the second lockdown from October 19th 2020 until present day (26/02/2021), workplace mo-  
655 bility has been reduced by approximately 25 %. During Autumn break and Christmas holidays,  
656 workplace mobility further declined to approximately 45 %. Public transport mobility decreased by  
657 30 % and by 50 % during holidays, leisure mobility decreased by 40-50 % and grocery & pharmacy  
658 mobility have decreased by approximtely 5-10 %. Primary and secondary schools were closed be-  
659 tween October 19th, 2020 and re-opened on November 16th, 2020. Further, schools have been closed  
660 during Christmas holidays from December 18th, 2020 until January 4th, 2021 and were closed during  
661 spring break from February 15th, 2021 until February 21th, 2021. Universities have remained fully  
662 closed since October 19th, 2020.

663  
664 A 30 % and 15 % increase in residential mobility were observed during the lockdowns. However,  
665 the figure indicates people spent on average 15 % -30 % more time at home every day, which does  
666 not necessarily mean having 15 % - 30 % more contacts at home. Further, the coefficients of the  
667 interaction matrices are also influenced by *network* effects and may thus not scale linearly with the  
668 decrease in the observed mobility. During a strict lockdown where social *bubbles* are the norm, an  
669 intra-household contact does not have the same weight as a random, extra-household contact as long  
670 as the virus is outside of the social *bubble*. However, amplifying the fraction of household contacts  
671 under lockdown measures will increase intergenerational mixing of the population under lockdown,  
672 which is unrealistic and will lead to overestimations of the hospitalizations. We thus used a coefficient  
673 of 1.0 for the home interaction matrix  $N_{c,home}$ .

7 SUPPLEMENTARY MATERIALS

7.3 Key events

**Table 4:** Dates of key events during the first and second lockdown in Belgium. Google mobility reduction (see Figure 2), computed as the average reduction between one key event and the next.

| Date                                            | Key event                  | Details                                                                                                                                                                          | $G_{work}$ | $G_{transit}$ | $G_{r\&r}$ | $G_{g\&p}$ | $H_{schools}$ |
|-------------------------------------------------|----------------------------|----------------------------------------------------------------------------------------------------------------------------------------------------------------------------------|------------|---------------|------------|------------|---------------|
| First COVID-19 wave (March - July 2020)         |                            |                                                                                                                                                                                  |            |               |            |            |               |
| 15/03/2020                                      | Lockdown                   | Closure of schools, bars, clubs and restaurants; Closure of all non-essential shops; Non-essential travel forbidden. [9]                                                         | -56 %      | -65 %         | -72 %      | -26 %      | -100 %        |
| 04/05/2020                                      | Lockdown release phase Ia  | Re-opening of industry and B2B services. Re-opening of non-essential retail. Merging of two <i>social bubbles</i> allowed [29].                                                  | -44 %      | -54 %         | -57 %      | -18 %      | -100 %        |
| 11/05/2020                                      | Lockdown release phase Ib  | Re-opening of all businesses and shops. Working at home remains the norm where possible.                                                                                         | -38 %      | -45 %         | -46 %      | -12 %      | -100 %        |
| 18/05/2020                                      | Lockdown release phase IIa | Re-opening of businesses that involve the most human-human contact (f.i. hairdressers). Re-opening of schools for graduating classes in elementary and secondary education [38]. | -38 %      | -39 %         | -39 %      | -8 %       | -100 %        |
| 04/06/2020                                      | Lockdown release phase III | Re-opening of bars and restaurants. Gatherings up to 10 persons are allowed.                                                                                                     | -22 %      | -27 %         | -15 %      | -4 %       | -100 %        |
| 01/07/2020                                      | Lockdown release phase IV  | Closure of schools for summer holidays. Gatherings of up to 15 persons are allowed.                                                                                              | -32 %      | -27 %         | -11 %      | -8 %       | -100 %        |
| 01/08/2020                                      | Antwerp down               | The number of infections starts increasing in Antwerp province, where a second lockdown with curfew is imposed [7].                                                              | -28 %      | -33 %         | -32 %      | -6 %       | -100 %        |
| Second COVID-19 wave (September 2020 - present) |                            |                                                                                                                                                                                  |            |               |            |            |               |
| 01/09/2020                                      | End of summer holidays     | Opening of elementary and secondary schools.                                                                                                                                     | -18 %      | -17 %         | -14 %      | -5 %       | -0 %          |
| 19/10/2020                                      | Lockdown                   | Closure of bars and restaurants; Curfew; Strict social restrictions. [1]                                                                                                         | -26 %      | -31 %         | -39 %      | -3 %       | -0 %          |
| 02/11/2020                                      | Lockdown                   | Closure of non-essential stores; Closure of all schools. [2]                                                                                                                     | -43 %      | -48 %         | -55 %      | -13 %      | -100 %        |
| 16/11/2020                                      | Schools reopen             | Elementary and secondary schools reopen. Universities remain closed.                                                                                                             | -27 %      | -37 %         | -44 %      | -5 %       | -0 %          |
| 12/18/2020 - 04/01/2021                         | Christmas holidays         | Elementary and secondary schools close. Decrease in work related mobility.                                                                                                       | -45 %      | -47 %         | -42 %      | -4 %       | -100 %        |
| 04/01/2021 - 15/02/2021                         | Period between holidays    | Elementary and secondary schools reopen. British variant (501Y.V1) starts spreading [9]. Vaccination campaign in elderly homes starts [33].                                      | -27 %      | -38 %         | -43 %      | -6 %       | -0 %          |

674 **7.4 Basic reproduction number**

675 Since the system of differential equations (eq. 1- eq. 13), is autonomous, the eigenvalues of the  
 676 Jacobian matrix evaluated at its hyperbolic equilibrium point can be used to determine the nature  
 677 of that equilibrium [16]. The basic reproduction number ( $R_0$ ) is computed as the spectral radius  
 678 of the Jacobian matrix at the disease-free equilibrium [10]. Our model has eight infected states:  
 679  $E, I, A, M, ER, C, C_{ICU,rec}$  and  $ICU$  (Figure 1). At the disease-free equilibrium, the whole population  
 680 is susceptible to the infectious disease,  $S_i = T_i$ ,

$$\mathbf{u}^* = (T_i, 0, 0, 0, 0, 0, 0, 0, 0, 0). \quad (26)$$

681 The Jacobian  $\mathbf{J}$  is defined as,

$$\mathbf{J} = \begin{bmatrix} \left. \frac{\partial f_1}{\partial x_1} \right|_{\mathbf{u}^*} & \cdots & \left. \frac{\partial f_1}{\partial x_n} \right|_{\mathbf{u}^*} \\ \vdots & \ddots & \vdots \\ \left. \frac{\partial f_m}{\partial x_1} \right|_{\mathbf{u}^*} & \cdots & \left. \frac{\partial f_m}{\partial x_n} \right|_{\mathbf{u}^*} \end{bmatrix}, \quad (27)$$

682 where  $n$  and  $m$  are equal to the number of infected compartments. Next, the Jacobian is decomposed  
 683 in the following form,

$$\mathbf{J}^* = (\mathbf{T} + \mathbf{\Sigma})\mathbf{J}. \quad (28)$$

684 The matrix  $\mathbf{T}$  contains all terms that lead to *transmissions* of SARS-CoV-2, while  $\mathbf{\Sigma}$  contains all terms  
 685 that lead to *transitions*. For our model,

$$\mathbf{T} = \begin{bmatrix} 0 & \beta \sum_{j=1}^N N_{c,ij} & \beta \sum_{j=1}^N N_{c,ij} & 0 & 0 & 0 & 0 & 0 \\ 0 & 0 & 0 & 0 & 0 & 0 & 0 & 0 \\ \vdots & \vdots \\ 0 & 0 & 0 & 0 & 0 & 0 & 0 & 0 \end{bmatrix}, \quad (29)$$

686 where an entry  $T_{i,j}$  is the rate at which individuals in infected state  $j$  gives rise to individuals in  
 687 infected state  $i$ . And,

7 SUPPLEMENTARY MATERIALS

7.4 Basic reproduction number

$$\Sigma = \begin{bmatrix} -1/\sigma & 0 & 0 & 0 & 0 & 0 & 0 & 0 & 0 & 0 & 0 \\ 1/\sigma & -1/\omega & 0 & 0 & 0 & 0 & 0 & 0 & 0 & 0 & 0 \\ 0 & a_i/\omega & -1/d_a & 0 & 0 & 0 & 0 & 0 & 0 & 0 & 0 \\ 0 & (1-a_i)/\omega & 0 & -\left(\frac{1-h_i}{d_m} + \frac{h_i}{d_{hosp}}\right) & -1/d_{ER} & 0 & 0 & 0 & 0 & 0 & 0 \\ 0 & 0 & 0 & \frac{h_i}{d_{hosp}} & -1/d_{ER} & -\left(\frac{m_{C,i}}{d_{c,D}} + \frac{1-m_{C,i}}{d_{c,R}}\right) & 0 & 0 & 0 & 0 & 0 \\ 0 & 0 & 0 & 0 & \frac{c_i}{d_{ER}} & -\left(\frac{m_{CU,i}}{d_{CU,D}} + \frac{1-m_{CU,i}}{d_{CU,R}}\right) & 0 & 0 & 0 & 0 & 0 \\ 0 & 0 & 0 & 0 & \frac{1-c_i}{d_{ER}} & -\left(\frac{m_{CU,i}}{d_{CU,D}} + \frac{1-m_{CU,i}}{d_{CU,R}}\right) & 0 & 0 & 0 & 0 & 0 \\ 0 & 0 & 0 & 0 & 0 & -\left(\frac{m_{CU,i}}{d_{CU,D}} + \frac{1-m_{CU,i}}{d_{CU,R}}\right) & -\left(\frac{m_{CU,i}}{d_{CU,D}} + \frac{1-m_{CU,i}}{d_{CU,R}}\right) & 0 & 0 & 0 & 0 \\ 0 & 0 & 0 & 0 & 0 & 0 & 0 & -\frac{1}{d_{CU,rec}} & 0 & 0 & 0 \end{bmatrix}, \quad (30)$$

## 7.5 Time-lagged cross correlation

## 7 SUPPLEMENTARY MATERIALS

688 where an element  $\Sigma_{i,j}^{-1}$  is the expected time that an individual who presently has state  $j$  will spend in  
689 state  $i$  during its entire epidemiological *life*. The next generation matrix (NGM) is then calculated as,

$$\text{NGM} = -\mathbf{T}\Sigma^{-1}. \quad (31)$$

690 The basic reproduction number  $R_0$  is defined as the spectral radius<sup>3</sup>  $\rho$  of this matrix [10],

$$R_0 = \rho(-\mathbf{T}\Sigma^{-1}), \quad (32)$$

691 which becomes for our model,

$$R_{0,i} = (a_i d_a + \omega) \beta \sum_{j=1}^N N_{c,ij}. \quad (33)$$

692 A linear relationship between the reproduction number and the chance of infection upon contact ( $\beta$ ),  
693 the number of contacts ( $N_c$ ) and the sum of the durations of infectiousness for those compartments  
694 able to infect susceptibles makes sense.

## 695 7.5 Time-lagged cross correlation

696 We extracted the number of laboratory confirmed cases in youths  $[0, 20[$ , the working population  
697  $[20, 60[$  and the senior population  $[60, \infty[$  from the *Belgian Scientific Institute of Public Health* (<https://epistat.sciensano.be/Data>) from November 2nd, 2020 to February 1st 2020. We then nor-  
698 malized the timeseries with the number of cases on November 21st, 2020 and visualized the result  
699 in Figure 3. Using the Python module *pandas*, the dataserie were shifted with  $k$  days and the cross  
700 correlation was computed. The procedure was performed for  $k \in [-15, 5]$  days, the resulting *cross*  
701 *correlation function* is shown in Figure 8 and the results of the analysis are summarized in Table 5.  
702 Next, we constructed a statistical test to check if the covariance between two series  $x$  and  $y$ , shifted  
703 with the number of days resulting in the maximum covariance,  $k_{max}$ , varied significantly from zero.  
704 Thus, the null hypothesis is,

$$H_0 : \rho_{xy}(k_{max}) = 0.0. \quad (34)$$

706 If the cross correlation of lag  $k_{max}$  is zero, then, for a fairly large timeseries consisting of  $n$  datapoints,  
707 the covariance  $\rho_{xy}(k_{max})$  will be approximately normally distributed, with mean zero and standard  
708 deviation  $\sigma = \frac{1}{\sqrt{n-|k|}}$ . Since approximately 95% of a normal population is within 2 standard devia-  
709 tions of the mean, a test will reject the hypothesis that the cross correlation of lag  $k$  equals zero when,

$$|\rho(k)| \geq \frac{2}{\sqrt{n-|k|}}. \quad (35)$$

711 The null hypothesis was rejected for all timeseries.

712

---

<sup>3</sup>Largest absolute eigenvalue.



7 SUPPLEMENTARY MATERIALS

7.6 Supplementary data and figures

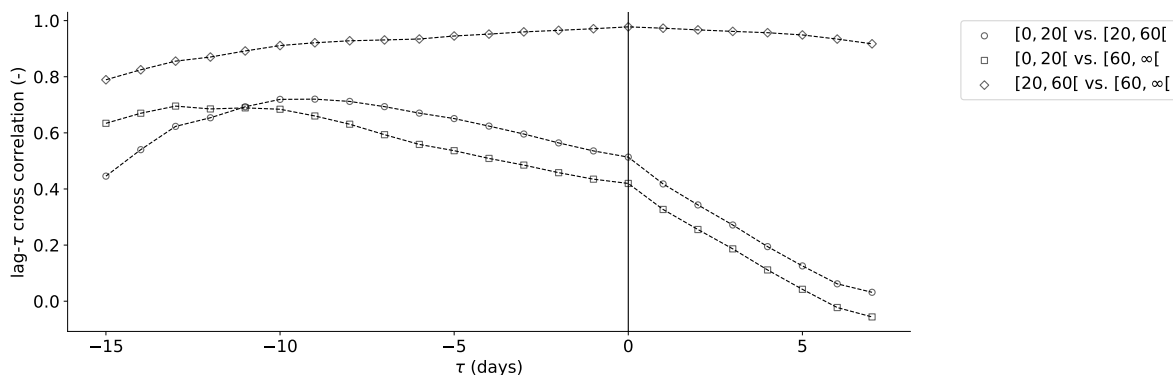

**Figure 8:** Cross correlation between the number of cases in Belgium in the age groups  $[0-20[$ ,  $[20-60[$  and  $[60-\infty[$ , from November 2nd, 2020 until February 1st 2020 in function of the number of days the timeseries are shifted relative to each other ( $\tau$ ). The maximum cross correlation is obtained when the series  $[0-20[$  and  $[20-60[$  are shifted -9 days, the maximum cross correlation is obtained when the series  $[0-20[$  and  $[60-\infty[$  are shifted -13 days, and the maximum cross correlation is obtained when the series  $[20-60[$  and  $[60-\infty[$  are not shifted.

**Table 5:** Results of the time-lagged cross-correlation between the number of cases in the age groups  $[0-20[$ ,  $[20-60[$  and  $[60-\infty[$ . Data from November 2nd, 2020 until February 1st 2020 were used in the analysis, which is equal to the daterange range shown in Figure 3.

| Age group (years)           | Time-lag (days) | Covariance (-) |
|-----------------------------|-----------------|----------------|
| $[0-20[$ vs. $[20-60[$      | -9              | 0.72           |
| $[0-20[$ vs. $[60-\infty[$  | -13             | 0.70           |
| $[20-60[$ vs. $[60-\infty[$ | 0               | 0.98           |

713 7.6 Supplementary data and figures

REFERENCES

REFERENCES

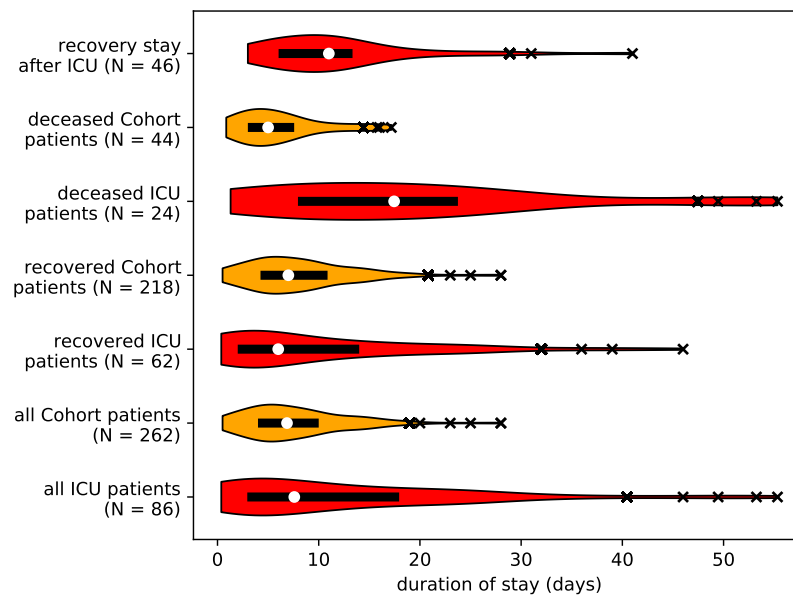

**Figure 9:** Observations of the length of a hospital stay for patients in cohort and ICU wards. Overall, if recovered, if deceased and for a recovery stay in cohort after ICU. Interquartile range, median observation and suspected outliers (more than 1.5 times above the third quartile) indicated.

714 **References**

715 [1] Abbeloos, J.-F. (2020a). Alle munitie uit de kast om dijkbreuk te vermijden. *De Standaard*.

716 [2] Abbeloos, J.-F. (2020b). 'dit zijn de maatregelen van de laatste kans'. *De Standaard*.

717 [3] Abrams, S., Wambua, J., Santermans, E., Willem, L., Kuylen, E., Coletti, P., Libin, P., Faes, C.,  
718 Petrof, O., Herzog, S. A., Beutels, P., and Hens, N. (2021). Modeling the early phase of the bel-  
719 gian covid-19 epidemic using a stochastic compartmental model and studying its implied future  
720 trajectories. *medRxiv*.

721 [4] Barbe, K., Blotwijk, S., and Cools, W. (2020). Data-driven epidemiological model to monitor the  
722 sustainability of hospital care. Technical Report ICDS300420, Vrije Universiteit Brussel.

723 [5] CDC COVID-19 Response Team (2020). Severe Outcomes Among Patients with Coronavirus  
724 Disease 2019 (COVID-19) - United States, February 12-March 16, 2020. *Morbidity and Mortality*  
725 *Weekly Report*, 69:343–346.

726 [6] Coletti, P., Wambua, J., Gimma, A., Willem, L., Vercruyssen, S., Vanhoutte, B., Jarvis, C. I., Van  
727 Zandvoort, K., Edmunds, J., Beutels, P., and Hens, N. (2020). CoMix: comparing mixing patterns  
728 in the Belgian population during and after lockdown. *Scientific Reports*, 10(1):21885.

729 [7] Cools, S. (2020). Antwerpen voert avondklok in. *De Standaard*.

REFERENCES

REFERENCES

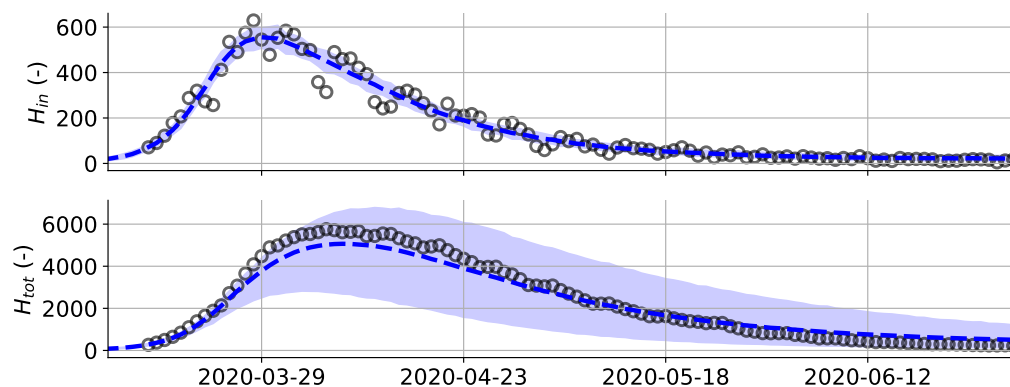

**Figure 10:** Model predictions for the daily Belgian hospitalizations (top) and the total number of patients in Belgium hospitals (bottom) during the first COVID-19 wave in Belgium, from March 15th, 2020 until July 1st, 2020. Mean and 95 % confidence interval of 1000 model realisations. The model is calibrated to the daily Belgian hospitalizations ( $H_{in}$ ), the prediction for the total number of patients ( $H_{tot}$ ) is obtained after propagating the age-stratified mortalities, age-stratified distributions between cohort and ICU and the residence time distributions derived from the hospital dataset in the model. Propagated uncertainty is large but the mean model prediction is accurate. This is most likely due to the broad residence time distributions (see Figure 9).

- 730 [8] Davies, N. G., Klepac, P., Liu, Y., Prem, K., Jit, M., Pearson, C. A. B., Quilty, B. J., Kucharski, A. J.,  
731 Gibbs, H., Clifford, S., Gimma, A., van Zandvoort, K., Munday, J. D., Diamond, C., Edmunds, W. J.,  
732 Houben, R. M. G. J., Hellewell, J., Russell, T. W., Abbott, S., Funk, S., Bosse, N. I., Sun, Y. F., Flasche,  
733 S., Rosello, A., Jarvis, C. I., Eggo, R. M., and working Group, C. C.-. (2020). Age-dependent effects  
734 in the transmission and control of COVID-19 epidemics. *Nature Medicine*.
- 735 [9] De Smet, D. (2021). De britse variant is niet meer te stuiten, de britse golf wel. *De Standaard*.
- 736 [10] Diekmann, O., Heesterbeek, J., and J.A.J., M. (1990). On the definition and the computation of  
737 the basic reproduction ratio  $R_0$  in models for infectious diseases in heterogeneous populations.  
738 *Journal of mathematical biology*, 28(4):365–382.
- 739 [11] Diekmann, O., Heesterbeek, J., and M.G., R. (2010). The construction of next-generation matrices  
740 for compartmental epidemic models. *Journal of the Royal Society, Interface*, 7(47):873–885.
- 741 [12] Franco, N. (2020). Covid-19 belgium: Extended seir-qd model with nursing homes and long-  
742 term scenarios-based forecasts. *medRxiv*.
- 743 [13] Goodman, J. and Weare, J. (2010). Ensemble samplers with affine invariance. *Communications in*  
744 *Applied Mathematics and Computational Science*, 5(1):65–80.
- 745 [14] Gouvernement, B. F. (2020). De trends van de afgelopen dagen zetten zich voort.

REFERENCES

REFERENCES

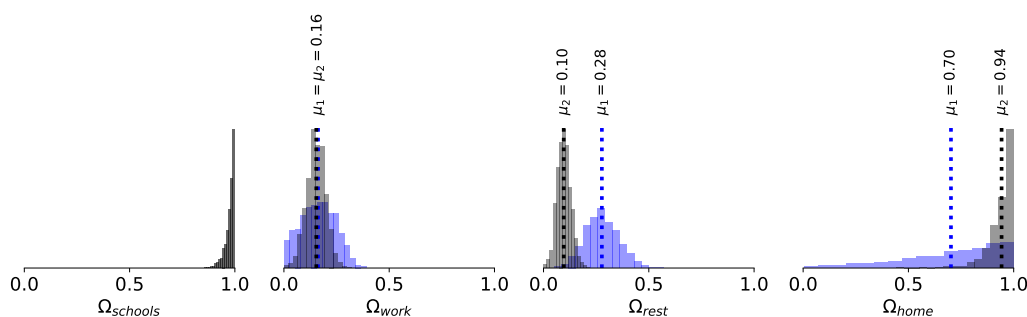

**Figure 11:** Inferred effectivity parameters at home ( $\Omega_{home}$ ), in the workplace ( $\Omega_{work}$ ), in schools ( $\Omega_{schools}$ ) and for the sum of leisure activities, other activities and public transport ( $\Omega_{rest}$ ), for the first COVID-19 wave (blue) and for the second COVID-19 wave (black). The effectivity of contacts in schools could not be deduced during the first COVID-19 wave because schools remained practically closed until July 1st, 2020. However, a high effectivity of contacts in schools could be deduced during the second COVID-19 wave. The effectivity of work contacts was roughly the same during both 2020 COVID-19 waves. The effectivity of leisure contacts was estimated to be lower during the second COVID-19 wave, however, leisure policies were not varied (yet) during the second COVID-19 wave, so the estimate must be taken with a grain of salt. Home contacts were deemed more effective by the model during the second COVID-19 wave.

REFERENCES

REFERENCES

- 746 [15] Gudbjartsson, D. F., Helgason, A., Jonsson, H., Magnusson, O. T., Melsted, P., Norddahl, G. L.,  
747 Saemundsdottir, J., Sigurdsson, A., Sulem, P., Agustsdottir, A. B., Eiriksdottir, B., Fridriksdottir, R.,  
748 Gardarsdottir, E. E., Georgsson, G., Gretarsdottir, O. S., Gudmundsson, K. R., Gunnarsdottir, T. R.,  
749 Gylfason, A., Holm, H., Jensson, B. O., Jonasdottir, A., Jonsson, F., Josefsdottir, K. S., Kristjansson,  
750 T., Magnusdottir, D. N., le Roux, L., Sigmundsdottir, G., Sveinbjornsson, G., Sveinsdottir, K. E.,  
751 Sveinsdottir, M., Thorarensen, E. A., Thorbjornsson, B., Löve, A., Masson, G., Jonsdottir, I., Möller,  
752 A. D., Gudnason, T., Kristinsson, K. G., Thorsteinsdottir, U., and Stefansson, K. (2020). Spread of  
753 sars-cov-2 in the icelandic population. *New England Journal of Medicine*, 0(0):null.
- 754 [16] Hartman, P. (1960). A lemma in the theory of structural stability of differential equations. vol-  
755 ume 11, pages 610–620.
- 756 [17] He, X., Lau, E. H. Y., Wu, P., Deng, X., Wang, J., Hao, X., Lau, Y. C., Wong, J. Y., Guan, Y.,  
757 Tan, X., Mo, X., Chen, Y., Liao, B., Chen, W., Hu, F., Zhang, Q., Zhong, M., Wu, Y., Zhao, L.,  
758 Zhang, F., Cowling, B. J., Li, F., and Leung, G. M. (2020). Temporal dynamics in viral shedding and  
759 transmissibility of COVID-19. *Nature Medicine*, 26(5):672–675.
- 760 [18] Kennedy, J. and Eberhart, R. (1995). Particle swarm optimization. In *Proceedings of ICNN'95 -*  
761 *International Conference on Neural Networks*, volume 4, pages 1942–1948 vol.4.
- 762 [19] Kermack, W. O., McKendrick, A. G., and Walker, G. T. (1927). A contribution to the mathemat-  
763 ical theory of epidemics. *Proceedings of the Royal Society of London. Series A, Containing Papers of a*  
764 *Mathematical and Physical Character*, 115(772):700–721.
- 765 [20] Lescure, F.-X., Bouadma, L., Nguyen, D., Parisey, M., Wicky, P.-H., Behillil, S., Gaymard, A.,  
766 Bouscambert-Duchamp, M., Donati, F., Hingrat, Q. L., Enouf, V., Houhou-Fidouh, N., Valette, M.,  
767 Mailles, A., Lucet, J.-C., Mentre, F., Duval, X., Descamps, D., Malvy, D., Timsit, J.-F., Lina, B.,  
768 Van-der Werf, S., and Yazdanpanah, Y. (2020). Clinical and virological data of the first cases of  
769 COVID-19 in Europe: a case series. *The Lancet Infectious Diseases*, 0(0).
- 770 [21] Li, Q., Guan, X., Wu, P., Wang, X., Zhou, L., Tong, Y., Ren, R., Leung, K. S., Lau, E. H., Wong,  
771 J. Y., Xing, X., Xiang, N., Wu, Y., Li, C., Chen, Q., Li, D., Liu, T., Zhao, J., Liu, M., Tu, W., Chen,  
772 C., Jin, L., Yang, R., Wang, Q., Zhou, S., Wang, R., Liu, H., Luo, Y., Liu, Y., Shao, G., Li, H., Tao,  
773 Z., Yang, Y., Deng, Z., Liu, B., Ma, Z., Zhang, Y., Shi, G., Lam, T. T., Wu, J. T., Gao, G. F., Cowling,  
774 B. J., Yang, B., Leung, G. M., and Feng, Z. (2020a). Early transmission dynamics in wuhan, china,  
775 of novel coronavirus-infected pneumonia. *New England Journal of Medicine*, 0(0):null.
- 776 [22] Li, R., Pei, S., Chen, B., Song, Y., Zhang, T., Yang, W., and Shaman, J. (2020b). Substantial undoc-  
777 umented infection facilitates the rapid dissemination of novel coronavirus (sars-cov2). *Science*.
- 778 [23] Linton, N. M., Kobayashi, T., Yang, Y., Hayashi, K., Akhmetzhanov, A. R., Jung, S.-M., Yuan, B.,  
779 Kinoshita, R., and Nishiura, H. (2020). Incubation Period and Other Epidemiological Characteris-  
780 tics of 2019 Novel Coronavirus Infections with Right Truncation: A Statistical Analysis of Publicly  
781 Available Case Data. *Journal of clinical medicine*, 9(2).
- 782 [24] Liu, T., Wu, S., Tao, H., Zeng, G., Zhou, F., Guo, F., and Wang, X. (2020a). Prevalence of igg  
783 antibodies to sars-cov-2 in wuhan - implications for the ability to produce long-lasting protective  
784 antibodies against sars-cov-2. *medRxiv*.

REFERENCES

REFERENCES

- 785 [25] Liu, Y., null, n., Funk, S., and Flasche, S. (2020b). The contribution of pre-symptomatic infection  
786 to the transmission dynamics of covid-2019 [version 1; peer review: 1 approved]. *Wellcome Open*  
787 *Research*, 5(58).
- 788 [26] Liu, Y., Yan, L.-M., Wan, L., Xiang, T.-X., Le, A., Liu, J.-M., Peiris, M., Poon, L. L. M., and Zhang,  
789 W. (2020c). Viral dynamics in mild and severe cases of COVID-19. *The Lancet Infectious Diseases*,  
790 0(0).
- 791 [27] Molenberghs, G., Faes, C., Aerts, J., Theeten, H., Devleeschauwer, B., Bustos Sierra, N., Braeyne,  
792 T., Renard, F., Herzog, S., Lusyne, P., Van der Heyden, J., Van Oyen, H., Van Damme, P., and Hens,  
793 N. (2020). Belgian covid-19 mortality, excess deaths, number of deaths per million, and infection  
794 fatality rates (8 march - 9 may 2020). *medRxiv*.
- 795 [28] Mossong, J., Hens, N., Jit, M., Beutels, P., Auranen, K., Mikolajczyk, R., Massari, M., Salmaso,  
796 S., Tomba, G. S., Wallinga, J., Heijne, J., Sadkowska-Todys, M., Rosinska, M., and Edmunds, W. J.  
797 (2008). Social contacts and mixing patterns relevant to the spread of infectious diseases. *PLOS*  
798 *Medicine*, 5(3):1–1.
- 799 [29] Open VLD (2020). Coronavirus : België heeft z'n exitstrategie vastgelegd.
- 800 [30] Park, M., Cook, A. R., Lim, J. T., Sun, Y., and Dickens, B. L. (2020). A Systematic Review of  
801 COVID-19 Epidemiology Based on Current Evidence. *Journal of clinical medicine*, 9(4).
- 802 [31] Riou, J. and Althaus, C. L. (2020). Pattern of early human-to-human transmission of wuhan 2019  
803 novel coronavirus (2019-ncov), december 2019 to january 2020. *Eurosurveillance*, 25(4).
- 804 [32] Shaman, J. and Galanti, M. (2020). Will sars-cov-2 become endemic? *Science*, 370(6516):527–529.
- 805 [33] Snoekx, K. (2021). Vaccinaties in rusthuizen komen in stroomversnelling. *De Standaard*.
- 806 [34] StatBEL (2020). Structure of the Population.
- 807 [35] To, K. K.-W., Tsang, O. T.-Y., Leung, W.-S., Tam, A. R., Wu, T.-C., Lung, D. C., Yip, C. C.-Y., Cai,  
808 J.-P., Chan, J. M.-C., Chik, T. S.-H., Lau, D. P.-L., Choi, C. Y.-C., Chen, L.-L., Chan, W.-M., Chan,  
809 K.-H., Ip, J. D., Ng, A. C.-K., Poon, R. W.-S., Luo, C.-T., Cheng, V. C.-C., Chan, J. F.-W., Hung,  
810 I. F.-N., Chen, Z., Chen, H., and Yuen, K.-Y. (2020). Temporal profiles of viral load in posterior  
811 oropharyngeal saliva samples and serum antibody responses during infection by SARS-CoV-2: an  
812 observational cohort study. *The Lancet Infectious Diseases*, 20(5):565–574.
- 813 [36] Verity, R., Okell, L. C., Dorigatti, I., Winskill, P., Whittaker, C., Imai, N., Cuomo-Dannenburg, G.,  
814 Thompson, H., Walker, P. G. T., Fu, H., Dighe, A., Griffin, J. T., Baguelin, M., Bhatia, S., Boonyasiri,  
815 A., Cori, A., Cucunubá, Z., FitzJohn, R., Gaythorpe, K., Green, W., Hamlet, A., Hinsley, W., Laydon,  
816 D., Nedjati-Gilani, G., Riley, S., van Elsland, S., Volz, E., Wang, H., Wang, Y., Xi, X., Donnelly, C. A.,  
817 Ghani, A. C., and Ferguson, N. M. (2020). Estimates of the severity of coronavirus disease 2019: a  
818 model-based analysis. *The Lancet Infectious Diseases*.
- 819 [37] Viner, R. M., Mytton, O. T., Bonell, C., Melendez-Torres, G., Ward, J., Hudson, L., Waddington,  
820 C., Thomas, J., Russell, S., van der Klis, F., Koirala, A., Ladhani, S., Panovska-Griffiths, J., Davies,  
821 N. G., Booy, R., and Eggo, R. M. (2020). Susceptibility to sars-cov-2 infection amongst children and  
822 adolescents compared with adults: a systematic review and meta-analysis. *medRxiv*.

REFERENCES

REFERENCES

- 823 [38] Vlaamse regering (2020). Heropstart van de lessen op school: wie, waarom en hoe.
- 824 [39] Wei, W. E., Li, Z., Chiew, C. J., Yong, S. E., Toh, M. P., and Lee, V. J. (2020). Presymptomatic  
825 Transmission of SARS-CoV-2 — Singapore, January 23–March 16, 2020. *Morbidity and Mortality*  
826 *Weekly Report*, 69:411–415.
- 827 [40] Whatty, S. (2020). Tijdelijke werkloosheid bijna gehalveerd. *Het Laatste Nieuws*.
- 828 [41] Willem, L. (2021). Restore.
- 829 [42] Willem, L., Abrams, S., Petrof, O., Coletti, P., Kuylens, E., Libin, P., Mogelmose, S., Wambua, J.,  
830 Herzog, S. A., Faes, C., Beutels, P., and Hens, N. (2020). The impact of contact tracing and house-  
831 hold bubbles on deconfinement strategies for covid-19: an individual-based modelling study.
- 832 [43] Willem, L., Van Kerckhove, K., Chao, D. L., Hens, N., and Beutels, P. (2012). A nice day for an  
833 infection? weather conditions and social contact patterns relevant to influenza transmission. *PLOS*  
834 *ONE*, 7(11):1–7.
- 835 [44] Wu, J. T., Leung, K., Bushman, M., Kishore, N., Niehus, R., de Salazar, P. M., Cowling, B. J.,  
836 Lipsitch, M., and Leung, G. M. (2020a). Estimating clinical severity of COVID-19 from the trans-  
837 mission dynamics in Wuhan, China. *Nature Medicine*, 26(4):506–510.
- 838 [45] Wu, J. T., Leung, K., and Leung, G. M. (2020b). Nowcasting and forecasting the potential domes-  
839 tic and international spread of the 2019-ncov outbreak originating in wuhan, china: a modelling  
840 study. *The Lancet*, 395(10225):689 – 697.
- 841 [46] Wu, Z. and McGoogan, J. M. (2020). Characteristics of and important lessons from the coro-  
842 navirus disease 2019 (covid-19) outbreak in china: Summary of a report of 72314 cases from the  
843 chinese center for disease control and prevention. *JAMA*.
- 844 [47] Zou, L., Ruan, F., Huang, M., Liang, L., Huang, H., Hong, Z., Yu, J., Kang, M., Song, Y., Xia, J.,  
845 Guo, Q., Song, T., He, J., Yen, H.-L., Peiris, M., and Wu, J. (2020). Sars-cov-2 viral load in upper  
846 respiratory specimens of infected patients. *New England Journal of Medicine*, 382(12):1177–1179.  
847 PMID: 32074444.

## ETHICS QUESTIONNAIRE

848

Name of the promotor:

INGMAR NOPEN, JAN BAETENS

Title of the proposal/project:

THE USE OF A COMPARTMENTAL, AGE-STRATIFIED, EXTENDED SEIRD MODEL AND PUBLIC MOBILITY DATA TO ASSESS THE EFFECTS OF NON-PHARMACEUTICAL INTERVENTIONS ON SARS-COV-2 SPREAD IN BELGIUM.

### A. INTRODUCTION

Research should be conducted according to ethical standards. Some are imposed by law, others are generally accepted in (international) scientific practice.

Researchers must reflect on the ethical aspects of their proposal and identify any ethical issues in the ethics questionnaire (**part B**). The actual questionnaire is followed by the declaration on honour (**part C**).

Sometimes there is a legal obligation to submit the project proposal to an ethics committee. This is made clear in the questionnaire. However, researchers may also submit their proposal to an ethics committee for an ethical approval if there is no legal obligation, e.g., when a journal requests an ethical approval. For further information, check our website in [Dutch](#) or [English](#). A dedicated [research tip](#) informs you on what is requested when specific ethics issues apply, and provides further background information.

Even if no ethical issues apply to your proposal, you must always complete **part C** of the questionnaire (**Declaration on honour**).



## 2. Humans

849

|                                                                                                                                                                                                                                                                                                                                                                                                                                                          | YES?                                                                                                                                                                 |
|----------------------------------------------------------------------------------------------------------------------------------------------------------------------------------------------------------------------------------------------------------------------------------------------------------------------------------------------------------------------------------------------------------------------------------------------------------|----------------------------------------------------------------------------------------------------------------------------------------------------------------------|
| 1. Does your research involve human participants? <ul style="list-style-type: none"> <li>a. Are they volunteers for social or human sciences research?</li> <li>b. Are they persons unable to give informed consent (including children / minors)?</li> <li>c. Are they vulnerable individuals or groups?</li> <li>d. Are they children / minors?</li> <li>e. Are they patients?</li> <li>f. Are they healthy volunteers for medical studies?</li> </ul> | <input type="checkbox"/><br><input type="checkbox"/><br><input type="checkbox"/><br><input type="checkbox"/><br><input type="checkbox"/><br><input type="checkbox"/> |
| 2. Does your research involve physical interventions on the study participants? <ul style="list-style-type: none"> <li>a. Does it involve invasive techniques?</li> <li>b. Does it involve collection of biological samples?</li> </ul>                                                                                                                                                                                                                  | <input type="checkbox"/><br><input type="checkbox"/><br><input type="checkbox"/>                                                                                     |

If you checked box 1.a, 1.b, 1.c or 1.d, please note that not every research involving human participants triggers the obligation to request an ethical approval. However, the journal in which you want to publish the results of your research might ask you to submit an ethical approval. For this reason, it might be advisable to request ethical approval anyway before the start of the project.

If you checked box 1.e, 1.f or 2, you must submit your proposal to the Committee for Medical Ethics, as soon as your application has been approved for funding. The project can only start when the committee has formally given an ethical approval of the project.

#### 4. Personal data

850

|                                                                           |                          |
|---------------------------------------------------------------------------|--------------------------|
|                                                                           | YES?                     |
| Does your research involve collecting and/or processing of personal data? | <input type="checkbox"/> |

If you checked the box, the EU General Data Protection Regulation (GDPR) requires that all personal data processing activities are registered in the GDPR register of each institution where the processing takes place before the start of the processing. At UGent, this registration should be done in [dmponline.be](https://dmponline.be). Check our [website](#) for more information on how to register your personal data processing activities.

## 6. Access and Benefit-Sharing and the Nagoya Protocol

851

|                                                                                                                                                                                                                                                                                                                                            | YES?                     |
|--------------------------------------------------------------------------------------------------------------------------------------------------------------------------------------------------------------------------------------------------------------------------------------------------------------------------------------------|--------------------------|
| <p>Does your research involve genetic (biological) resources and/or traditional knowledge associated with genetic resources, that are in scope of the Nagoya Protocol and/or the related EU Regulation 511/2014?</p> <p>→ Name of the country/ies of origin:</p> <div style="background-color: #cccccc; height: 40px; width: 100%;"></div> | <input type="checkbox"/> |

Usually, you must obtain a 'Prior Informed Consent' (PIC) from the Competent National Authority in the country of origin (provider country) prior to the access and utilization of the genetic resources or traditional knowledge. The conditions for utilization, and benefit sharing, must be negotiated and registered in 'Mutually Agreed Terms' (MAT). Check our website in [Dutch](#) or [English](#) for more information.

## 8. Dual-use and military applications

852

|                                                                                                                                              | YES?                     |
|----------------------------------------------------------------------------------------------------------------------------------------------|--------------------------|
| 1. Does your research have the potential for military applications?                                                                          | <input type="checkbox"/> |
| 2. Does your research involve dual-use items in the sense of EU Regulation 428/2009, or other items for which an export license is required? | <input type="checkbox"/> |

If you checked any of the boxes, be aware that research proposals with potential military applications or involving dual-use items must comply with Ghent University's dual-use research policy and must be reported to Ghent University's Dual-Use Contact Point. You might need an export license if you wish to export dual-use items. Check our website in [Dutch](#) or [English](#) for more information.

Not every dual-use research triggers the obligation to request an ethical approval. However, you must inform the Dual Use Contact Point of your dual-use research [using the Dual-Use Notification Form](#). The journal in which you want to publish the results of your research might ask you to submit an ethical approval. For this reason, it might be advisable to request an ethical approval from the Committee on Human Rights Policy and Dual-Use Research anyway before the start of the project.

## 10. Environment and health & safety

853

|                                                                                                                                                                                                                                                                                                                                                                     | YES?                     |
|---------------------------------------------------------------------------------------------------------------------------------------------------------------------------------------------------------------------------------------------------------------------------------------------------------------------------------------------------------------------|--------------------------|
| 1. Does your research involve the use of elements (chemical, physical, sound, ...) that may cause harm to the environment (water, air, soil, ...), or to animals or plants?                                                                                                                                                                                         | <input type="checkbox"/> |
| 2. Does your research involve the use of elements (chemical, physical, sound, ...) that may cause harm to humans, including research staff and their co-workers?                                                                                                                                                                                                    | <input type="checkbox"/> |
| 3. Is (part of) your research carried out within protected areas?                                                                                                                                                                                                                                                                                                   | <input type="checkbox"/> |
| 4. Do the proposed experiments make use of GMOs or pathogens?                                                                                                                                                                                                                                                                                                       | <input type="checkbox"/> |
| 5. Do the proposed experiments make use of activities, installations or products that need to be covered by permits (narcotic drugs and precursors, hormonal substances, explosives and precursors, cyanides, ozone-depleting substances, ionizing radiation, radioactive substances, soils/animals/animal parts and by-products/plants from third countries, ...)? | <input type="checkbox"/> |

If you checked the box at questions 4 and/or 5, please ensure that you comply with the applicable legislations and guidelines regarding the environment, health and safety.

For question 4, an attestation concerning biosafety is required. See our [Dutch webpage](#) and [milieu@ugent.be](mailto:milieu@ugent.be).

For question 5, different types of permits or attestations or a compulsory notification may be required:

- Narcotic drugs and precursors, hormonal substances, explosive compounds, ozone-depleting substances, soils/animals/animal parts and by-products/plants from third countries: see our [Dutch webpage](#) and [milieu@ugent.be](mailto:milieu@ugent.be).
- Cyanides and prohibited substances: see our [Dutch webpage](#) and [veiligheid@ugent.be](mailto:veiligheid@ugent.be).
- Ionizing radiation and radioactive substances: see our [Dutch webpage](#) and [straling@ugent.be](mailto:straling@ugent.be).

### C. DECLARATION ON HONOUR

854

Please confirm which of the following situations apply to your research (multiple answers are possible). It is required to at least answer either question 1 or 2.

|                                                                                                                                                                                                                                                                                                                                                                                                                                                                                                                                                                                                                                                                                                                                                                                                                                                                                                                                                                                                                                                                                                                                                                                                                                                                                                                                                                                                                                                                                                                                                                                                                                                                                                  |                                     |
|--------------------------------------------------------------------------------------------------------------------------------------------------------------------------------------------------------------------------------------------------------------------------------------------------------------------------------------------------------------------------------------------------------------------------------------------------------------------------------------------------------------------------------------------------------------------------------------------------------------------------------------------------------------------------------------------------------------------------------------------------------------------------------------------------------------------------------------------------------------------------------------------------------------------------------------------------------------------------------------------------------------------------------------------------------------------------------------------------------------------------------------------------------------------------------------------------------------------------------------------------------------------------------------------------------------------------------------------------------------------------------------------------------------------------------------------------------------------------------------------------------------------------------------------------------------------------------------------------------------------------------------------------------------------------------------------------|-------------------------------------|
| <p>1. I declare on honour that <b>none of the ethical issues</b> in part B of the questionnaire <b>apply to my proposal</b>.</p>                                                                                                                                                                                                                                                                                                                                                                                                                                                                                                                                                                                                                                                                                                                                                                                                                                                                                                                                                                                                                                                                                                                                                                                                                                                                                                                                                                                                                                                                                                                                                                 | <input checked="" type="checkbox"/> |
| <p>2. I declare on honour that <b>one or more of the ethical issues</b> in part B of the questionnaire <b>do apply to my proposal</b> and I commit to adhere to all relevant legislation, regulations and institutional guidelines and policies.</p>                                                                                                                                                                                                                                                                                                                                                                                                                                                                                                                                                                                                                                                                                                                                                                                                                                                                                                                                                                                                                                                                                                                                                                                                                                                                                                                                                                                                                                             | <input type="checkbox"/>            |
| <p>3. I declare that for one or more ethical issues in part B of the questionnaire <b>an ethical approval is required</b>. I declare on honour that <b>I will submit my project proposal</b> in due time to the competent research <b>ethics committee(s)</b>.</p> <p>Please indicate which ethics committee(s) will deal with your application:</p> <ul style="list-style-type: none"> <li><input type="checkbox"/> Medical Ethics Committee</li> <li><input type="checkbox"/> Federal Commission for Embryos</li> <li><input type="checkbox"/> Ethics Committee for Animal Testing of the Faculty of Veterinary Sciences, also competent for the Faculty of Bioscience Engineering</li> <li><input type="checkbox"/> Ethics Committee for Animal Testing of the Faculty of Medicine and Health Sciences, also competent for the Faculty of Pharmaceutical Sciences</li> <li><input type="checkbox"/> Ethics Committee for Animal Testing of the Faculty of Sciences and the VIB</li> <li><input type="checkbox"/> Committee on Human Rights Policy and Dual-use Research</li> <li><input type="checkbox"/> Ethics Committee of the Faculty of Arts and Philosophy</li> <li><input type="checkbox"/> Ethics Committee of the Faculty of Engineering and Architecture</li> <li><input type="checkbox"/> Ethics Committee of the Faculty of Law and Criminology</li> <li><input type="checkbox"/> Ethics Committee of the Faculty of Economics and Business Administration</li> <li><input type="checkbox"/> Ethics Committee of the Faculty of Psychology and Educational Sciences</li> <li><input type="checkbox"/> Ethics Committee of the Faculty of Political and Social Sciences</li> </ul> | <input type="checkbox"/>            |
